# Supplementary material for: Synthesis and biological evaluation of novel N-α-haloacylated homoserine lactones as quorum sensing modulators
Source: publisher site journal article supplement (doi:10.3762/bjoc.10.265), 2014-10-30

**Supporting Information File 2**  
**for**  
**Synthesis and biological evaluation of novel *N*- $\alpha$ -**  
**haloacylated homoserine lactones as quorum sensing**  
**modulators**

Michail Syrpas, Ewout Ruysbergh, Christian V. Stevens, Norbert De Kimpe and Sven Mangelinckx \*

Address: <sup>1</sup>Department of Sustainable Organic Chemistry and Technology, Ghent University, Coupure Links 653, B-9000 Ghent, Belgium

Email: Sven Mangelinckx - Sven.Mangelinckx@Ugent.be

\* Corresponding author

**<sup>1</sup>H and <sup>13</sup>C NMR data and spectra, IR, HRMS, optical rotation and  
melting point data, chromatographic separation and yields of  
synthesized compounds.**

**Characterization of novel compounds**

***N*-(2-Bromoheptanoyl)-(S)-homoserine lactone (6b)**

(IUPAC: 2-bromo-*N*-[(3*S*)-tetrahydro-2-oxo-3-furanyl]heptanamide)

**<sup>1</sup>H NMR (300 MHz, CDCl<sub>3</sub>):** δ 0.89 (3H, t, J=6.7 Hz, CH<sub>3, isomer 1 and 2</sub>); 1.24-1.55 (6H, m, (CH<sub>2</sub>)<sub>3</sub>CH<sub>3, isomer 1 and 2</sub>); 1.94-2.05 (1H, m, CHH'CHBr<sub>isomer 1 and 2</sub>); 2.05-2.16 (1H, m, CHH'CHBr<sub>isomer 1 and 2</sub>); 2.16-2.30 (1H, m, OCH<sub>2</sub>CHH'<sub>isomer 1 and 2</sub>); 2.79-2.90 (1H, m, OCH<sub>2</sub>CHH'<sub>isomer 1 and 2</sub>); 4.27-4.36 (2H, m, CHBr<sub>isomer 1 and 2</sub> and OCHH'<sub>isomer 1 and 2</sub>); 4.48-4.53 (0.5H, m, CHN<sub>isomer 1</sub>); 4.50 (1H, t, J=8.7 Hz, OCHH'<sub>isomer 1 and 2</sub>); 4.51-4.60 (0.5H, m, CHN<sub>isomer 2</sub>); 6.92 (1H, d, J=5.5 Hz, NH<sub>isomer 1 and 2</sub>). **<sup>13</sup>C NMR (75 MHz, CDCl<sub>3</sub>):** δ 14.0 (CH<sub>3, isomer 1 and 2</sub>); 22.5; 26.9; 27.0 and 31.0 ((CH<sub>2</sub>)<sub>3</sub>CH<sub>3, isomer 1 and 2</sub>); 30.0 (CH<sub>2</sub>CHN<sub>isomer 1 and 2</sub>); 35.61 (CH<sub>2</sub>CHBr<sub>isomer 1</sub>); 35.68 (CH<sub>2</sub>CHBr<sub>isomer 2</sub>); 49.8 (CHN<sub>isomer 1 and 2</sub>); 50.4 (CHBr<sub>isomer 1</sub>); 50.6 (CHBr<sub>isomer 2</sub>); 66.12 (CH<sub>2</sub>O<sub>isomer 1</sub>); 66.15 (CH<sub>2</sub>O<sub>isomer 2</sub>); 169.71 (NC=O<sub>isomer 1</sub>); 169.73 (NC=O<sub>isomer 2</sub>); 174.75 (OC=O<sub>isomer 1</sub>); 174.84 (OC=O<sub>isomer 2</sub>). **MS (ESI): m/z (%):** 292/294 (M+H<sup>+</sup>, 100). **HRMS mass calculated:** C<sub>11</sub>H<sub>18</sub>BrNO<sub>3</sub>H<sup>+</sup> 292.0537; **obtained:** 292.0536. **IR (cm<sup>-1</sup>):** ν<sub>max</sub> 1014; 1171 (C-O); 1551 (HN-C=O); 1654 (HN-C=O); 1772 (C=O<sub>lactone</sub>); 2854 (CH); 2925 (CH); 2952 (CH); 3295 (NH). **Chromatography:** EtOAc:PE 4:1 R<sub>f</sub> = 0.49. **Melting Point:** 152°C. White powder. **Y:** 40%.

### ***N*-(2-Bromooctanoyl)-(S)-homoserine lactone (6c)**

(IUPAC: 2-bromo-*N*-[(3*S*)-tetrahydro-2-oxo-3-furanyl]octanamide)

**<sup>1</sup>H NMR (300 MHz, CDCl<sub>3</sub>):** δ 0.88 (3H, t, J=6.9 Hz, CH<sub>3, isomer 1 and 2</sub>); 1.21-1.54 (8H, m, (CH<sub>2</sub>)<sub>4</sub>CH<sub>3, isomer 1 and 2</sub>); 1.94-2.06 (1H, m, CHH'CHBr<sub>isomer 1 and 2</sub>); 2.06-2.15 (1H, m, CHH'CHBr<sub>isomer 1 and 2</sub>); 2.15-2.29 (1H, m, OCH<sub>2</sub>CHH'<sub>isomer 1 and 2</sub>); 2.80-2.91 (1H, m, OCH<sub>2</sub>CHH'<sub>isomer 1 and 2</sub>); 4.26-4.36 (2H, m, CHBr<sub>isomer 1 and 2</sub> and OCHH'<sub>isomer 1 and 2</sub>); 4.50 (1H, t, J=8.8 Hz, OCHH'<sub>isomer 1 and 2</sub>); 4.49-4.60 (1H, m, CHN<sub>isomer 1 and 2</sub>); 6.83 (1H, d,

$J=6.83$  Hz,  $\text{NH}_{\text{isomer 1 and 2}}$ .  $^{13}\text{C}$  NMR (75 MHz,  $\text{CDCl}_3$ ):  $\delta$  14.1 ( $\text{CH}_3$ , isomer 1 and 2); 22.6; 27.1; 27.2; 28.5 and 31.6 ( $(\text{CH}_2)_4\text{CH}_3$ , isomer 1 and 2); 30.1 ( $\text{CH}_2\text{CHN}$ , isomer 1 and 2); 35.67 ( $\text{CH}_2\text{CHBr}$ , isomer 1); 35.73 ( $\text{CH}_2\text{CHBr}$ , isomer 2); 49.8 ( $\text{CHN}$ , isomer 1 and 2); 50.5 ( $\text{CHBr}$ , isomer 1); 50.7 ( $\text{CHBr}$ , isomer 2); 66.12 ( $\text{CH}_2\text{O}$ , isomer 1); 66.15 ( $\text{CH}_2\text{O}$ , isomer 2); 169.7 ( $\text{NC}=\text{O}$ , isomer 1); 169.8 ( $\text{NC}=\text{O}$ , isomer 2); 174.7 ( $\text{OC}=\text{O}$ , isomer 1); 174.8 ( $\text{OC}=\text{O}$ , isomer 2). **MS (ESI): m/z (%)**: 306/308 ( $\text{M}+\text{H}^+$ , 100). **HRMS mass calculated**:  $\text{C}_{12}\text{H}_{20}\text{BrNO}_3\text{H}^+$  306.0693; **obtained**: 306.0691. **IR ( $\text{cm}^{-1}$ )**:  $\nu_{\text{max}}$  1016; 1181 (C-O); 1552 (HN-C=O); 1654 (HN-C=O); 1770 (C=O<sub>lactone</sub>); 2854 (CH); 2924 (CH); 2955 (CH); 3295 (NH). **Chromatography**: EtOAc:PE 4:1  $R_f$  = 0.51. **Melting Point**: 154°C. White powder. **Y**: 44%.

### ***N*-(2-Bromononanoyl)-(S)-homoserine lactone (6d)**

(IUPAC: 2-bromo-*N*-[(3*S*)-tetrahydro-2-oxo-3-furanyl]nonanamide)

$^1\text{H}$  NMR (300 MHz,  $\text{CDCl}_3$ ):  $\delta$  0.88 (3H, t,  $J=6.9$  Hz,  $\text{CH}_3$ , isomer 1 and 2); 1.20-1.53 (10H, m,  $(\text{CH}_2)_5\text{CH}_3$ , isomer 1 and 2); 1.94-2.06 (1H, m,  $\text{CHH}'\text{CHBr}$ , isomer 1 and 2); 2.06-2.15 (1H, m,  $\text{CHH}'\text{CHBr}$ , isomer 1 and 2); 2.15-2.30 (1H, m,  $\text{OCH}_2\text{CHH}'$ , isomer 1 and 2); 2.79-2.90 (1H, m,  $\text{OCH}_2\text{CHH}'$ , isomer 1 and 2); 4.26-4.36 (2H, m,  $\text{CHBr}$ , isomer 1 and 2 and  $\text{OCHH}'$ , isomer 1 and 2); 4.50 (1H, t,  $J=9.2$  Hz,  $\text{OCHH}'$ , isomer 1 and 2); 4.52-4.61 (1H, m,  $\text{CHN}$ , isomer 1 and 2) 6.95 (1H, d,  $J=5.5$  Hz,  $\text{NH}$ , isomer 1 and 2).  $^{13}\text{C}$  NMR (75 MHz,  $\text{CDCl}_3$ ):  $\delta$  14.2 ( $\text{CH}_3$ , isomer 1 and 2); 22.7; 27.25; 27.31; 28.8; 29.1 and 31.8 ( $(\text{CH}_2)_5\text{CH}_3$ , isomer 1 and 2); 30.0 ( $\text{CH}_2\text{CHN}$ , isomer 1 and 2); 35.6 ( $\text{CH}_2\text{CHBr}$ , isomer 1); 35.7 ( $\text{CH}_2\text{CHBr}$ , isomer 2); 49.8 ( $\text{CHN}$ , isomer 1 and 2); 50.4 ( $\text{CHBr}$ , isomer 1); 50.5 ( $\text{CHBr}$ , isomer 2); 66.17 ( $\text{CH}_2\text{O}$ , isomer 1); 66.20 ( $\text{CH}_2\text{O}$ , isomer 2); 169.8 ( $\text{NC}=\text{O}$ , isomer 1); 169.9 ( $\text{NC}=\text{O}$ , isomer 2); 174.8 ( $\text{OC}=\text{O}$ , isomer 1); 174.9 ( $\text{OC}=\text{O}$ , isomer 2). **MS (ESI): m/z (%)**: 320/322

(M+H<sup>+</sup>, 100). **HRMS mass calculated:** C<sub>13</sub>H<sub>22</sub>BrNO<sub>3</sub>H<sup>+</sup> 320.0850; **obtained:** 320.0848. **IR (cm<sup>-1</sup>):**  $\nu_{\max}$  1014; 1180 (C-O); 1551 (HN-C=O); 1654 (HN-C=O); 1770 (C=O<sub>lactone</sub>); 2852 (CH); 2922 (CH); 2954 (CH); 3304 (NH). **Chromatography:** EtOAc:PE 4:1 R<sub>f</sub> = 0.54. **Melting Point:** 156°C. White powder. **Y:** 43%.

### ***N*-(2-Bromodecanoyl)-(S)-homoserine lactone (6e)**

(IUPAC: 2-bromo-*N*-[(3*S*)-tetrahydro-2-oxo-3-furanyl]decanamide)

**<sup>1</sup>H NMR (300 MHz, CDCl<sub>3</sub>):**  $\delta$  0.88 (3H, t, J=6.6 Hz, CH<sub>3</sub>, isomer 1 and 2); 1.20-1.56 (12H, m, (CH<sub>2</sub>)<sub>6</sub>CH<sub>3</sub>, isomer 1 and 2); 1.94-2.07 (1H, m, CHH'CHBr, isomer 1 and 2); 2.07-2.15 (1H, m, CHH'CHBr, isomer 1 and 2); 2.15-2.30 (1H, m, OCH<sub>2</sub>CHH', isomer 1 and 2); 2.79-2.91 (1H, m, OCH<sub>2</sub>CHH', isomer 1 and 2); 4.24-4.36 (2H, m, CHBr, isomer 1 and 2 and OCHH', isomer 1 and 2); 4.50 (1H, t, J=9.2 Hz, OCHH', isomer 1 and 2); 4.52-4.60 (1H, m, CHN, isomer 1 and 2); 6.93 (1H, d, J=5.5 Hz, NH, isomer 1 and 2). **<sup>13</sup>C NMR (75 MHz, CDCl<sub>3</sub>):**  $\delta$  14.2 (CH<sub>3</sub>, isomer 1 and 2); 22.7; 27.20; 27.25; 28.9; 29.2 and 31.9 ((CH<sub>2</sub>)<sub>6</sub>CH<sub>3</sub>, isomer 1 and 2); 30.0 (CH<sub>2</sub>CHN, isomer 1 and 2); 35.65 (CH<sub>2</sub>CHBr, isomer 1); 35.71 (CH<sub>2</sub>CHBr, isomer 2); 49.8 (CHN, isomer 1 and 2); 50.4 (CHBr, isomer 1); 50.5 (CHBr, isomer 2); 66.15 (CH<sub>2</sub>O, isomer 1); 66.18 (CH<sub>2</sub>O, isomer 2); 169.8 (NC=O, isomer 1); 169.9 (NC=O, isomer 2); 174.8 (OC=O, isomer 1); 174.9 (OC=O, isomer 2). **MS (ESI): m/z (%):** 334/336 (M+H<sup>+</sup>, 100). **HRMS mass calculated:** C<sub>14</sub>H<sub>24</sub>BrNO<sub>3</sub>H<sup>+</sup> 334.1006; **obtained:** 334.1006. **IR (cm<sup>-1</sup>):**  $\nu_{\max}$  1016; 1178 (C-O); 1550 (HN-C=O); 1659 (HN-C=O); 1771 (C=O<sub>lactone</sub>); 2851 (CH); 2920 (CH); 2955 (CH); 3303 (NH). **Chromatography:** EtOAc:PE 4:1 R<sub>f</sub> = 0.56. **Melting Point:** 154°C. White powder. **Y:** 39%.

### ***N*-(2-Bromododecanoyl)-(S)-homoserine lactone (6f)**

(IUPAC: 2-bromo-*N*-[(3*S*)-tetrahydro-2-oxo-3-furanyl]dodecanamide)

**<sup>1</sup>H NMR (300 MHz, CDCl<sub>3</sub>):** δ 0.88 (3H, t, J=6.6 Hz, CH<sub>3, isomer 1 and 2</sub>); 1.20-1.54 (16H, m, (CH<sub>2</sub>)<sub>8</sub>CH<sub>3, isomer 1 and 2</sub>); 1.94-2.14 (2H, m, CH<sub>2</sub>CHBr<sub>, isomer 1 and 2</sub>); 2.14-2.29 (1H, m, OCH<sub>2</sub>CHH'<sub>isomer 1 and 2</sub>); 2.80-2.91 (1H, m, OCH<sub>2</sub>CHH'<sub>isomer 1 and 2</sub>); 4.21-4.36 (2H, m, CHBr<sub>isomer 1 and 2</sub> and OCHH'<sub>isomer 1 and 2</sub>); 4.50 (1H, t, J=9.2 Hz, OCHH'<sub>isomer 1 and 2</sub>); 4.51-4.60 (1H, m, CHN<sub>isomer 1 and 2</sub>); 6.92 (1H, d, J=6.1 Hz, NH<sub>isomer 1 and 2</sub>). **<sup>13</sup>C NMR (75 MHz, CDCl<sub>3</sub>):** δ 14.3 (CH<sub>3, isomer 1 and 2</sub>); 22.8; 27.26; 27.31; 28.9; 29.4; 29.59; 29.63 and 32.0 ((CH<sub>2</sub>)<sub>8</sub>CH<sub>3, isomer 1 and 2</sub>); 30.0 (CH<sub>2</sub>CHN<sub>isomer 1 and 2</sub>); 35.5 (CH<sub>2</sub>CHBr<sub>isomer 1 and 2</sub>); 49.9 (CHN<sub>isomer 1 and 2</sub>); 50.5 (CHBr<sub>isomer 1</sub>); 50.6 (CHBr<sub>isomer 2</sub>); 66.2 (CH<sub>2</sub>O<sub>isomer 1</sub>); 66.3 (CH<sub>2</sub>O<sub>isomer 2</sub>); 169.88 (NC=O<sub>isomer 1</sub>); 169.94 (NC=O<sub>isomer 1</sub>); 174.86 (OC=O<sub>isomer 1</sub>); 174.94 (OC=O<sub>isomer 2</sub>). **MS (ESI): m/z (%):** 362/364 (M+H<sup>+</sup>, 100). **HRMS mass calculated:** C<sub>16</sub>H<sub>28</sub>BrNO<sub>3</sub>H<sup>+</sup> 362.1319; **obtained:** 362.1319 **IR (cm<sup>-1</sup>):** ν<sub>max</sub> 1016; 1179 (C-O); 1550 (HN-C=O); 1652 (HN-C=O); 1771 (C=O<sub>lactone</sub>); 2851 (CH); 2920 (CH); 2954 (CH); 3302 (NH). **Chromatography:** EtOAc:PE 4:1 R<sub>f</sub> = 0.58. **Melting Point:** 148°C. White powder. **Y:** 38%.

### ***N*-(2-Iodoheptanoyl)-(S)-homoserine lactone (8b)**

(IUPAC: 2-iodo-*N*-[(3*S*)-tetrahydro-2-oxo-3-furanyl]heptanamide)

**<sup>1</sup>H NMR (300 MHz, CDCl<sub>3</sub>):** δ 0.89 (3H, t, J=7.2 Hz, CH<sub>3, isomer 1 and 2</sub>); 1.23-1.48 (6H, m, (CH<sub>2</sub>)<sub>3</sub>CH<sub>3, isomer 1 and 2</sub>); 1.99 (2H, q, J=7.3 Hz, CH<sub>2</sub>CHI<sub>isomer 1 and 2</sub>); 2.14-2.29 (1H, m, OCH<sub>2</sub>CHH'<sub>isomer 1 and 2</sub>); 2.80-2.93 (1H, m, OCH<sub>2</sub>CHH'<sub>isomer 1 and 2</sub>); 4.27-4.36 (1H, m, OCHH'<sub>isomer 1 and 2</sub>); 4.32 (1H, t, J=7.2 Hz, CHI<sub>isomer 1 and 2</sub>); 4.51 (1H, t, J=8.8 Hz, OCHH'<sub>isomer 1 and 2</sub>); 4.49-4.56 (0.5H, m, CHN<sub>isomer 1</sub>); 4.62 (0.5H, ddd, J=11.7 Hz, 8.7 Hz, 6.1 Hz, CHN<sub>isomer 2</sub>); 6.55 (0.5H, d, J=6.1 Hz, NH<sub>isomer 1</sub>); 6.63 (0.5H, d, J=6.1 Hz,

NH<sub>isomer 2</sub>). **<sup>13</sup>C NMR (75 MHz, CDCl<sub>3</sub>):** δ 14.0 (CH<sub>3</sub>, isomer 1 and 2); 22.5; 29.1 and 30.9 ((CH<sub>2</sub>)<sub>3</sub>CH<sub>3</sub>, isomer 1 and 2); 24.97 (CHI<sub>isomer 1</sub>); 25.02 (CHI<sub>isomer 2</sub>); 29.7 (CH<sub>2</sub>CHN<sub>isomer 1</sub>); 29.8 (CH<sub>2</sub>CHN<sub>isomer 2</sub>); 36.4 (CH<sub>2</sub>CHI<sub>isomer 1</sub>); 36.6 (CH<sub>2</sub>CHI<sub>isomer 2</sub>); 49.6 (CHN<sub>isomer 1</sub>); 49.8 (CHN<sub>isomer 2</sub>); 66.2 (CH<sub>2</sub>O<sub>isomer 1 and 2</sub>); 171.3 (NC=O<sub>isomer 1</sub>); 171.5 (NC=O<sub>isomer 2</sub>); 175.2 (OC=O<sub>isomer 1</sub>); 175.3 (OC=O<sub>isomer 2</sub>). **MS (ESI): m/z (%):** 340 (M+H<sup>+</sup>, 100). **HRMS mass calculated:** C<sub>11</sub>H<sub>18</sub>INO<sub>3</sub>H<sup>+</sup> 340.0409; **obtained:** 340.0405. **IR (cm<sup>-1</sup>):** ν<sub>max</sub> 1010; 1184 (C-O); 1557 (HN-C=O); 1641 (HN-C=O); 1765 (C=O<sub>lactone</sub>); 2854 (CH); 2925 (CH); 2953 (CH); 3298 (NH). **Chromatography:** EtOAc:PE 4:1 R<sub>f</sub> = 0.58. **Melting Point:** 150°C. Yellowish powder. **Y:** 66%.

### ***N*-(2-iodooctanoyl)-(S)-homoserine lactone (8c)**

(IUPAC: 2-iodo-*N*-[(3*S*)-tetrahydro-2-oxo-3-furanyl]octanamide)

**<sup>1</sup>H NMR (300 MHz, CDCl<sub>3</sub>):** δ 0.88 (3H, t, J=7.2 Hz, CH<sub>3</sub>, isomer 1 and 2); 1.18-1.51 (8H, m, (CH<sub>2</sub>)<sub>4</sub>CH<sub>3</sub>, isomer 1 and 2); 1.99 (2H, q, J=7.2 Hz, CH<sub>2</sub>CHI<sub>isomer 1 and 2</sub>); 2.10-2.27 (1H, m, OCH<sub>2</sub>CHH'<sub>isomer 1 and 2</sub>); 2.83-2.94 (1H, m, OCH<sub>2</sub>CHH'<sub>isomer 1 and 2</sub>); 4.26-4.35 (1H, m, OCHH'<sub>isomer 1 and 2</sub>); 4.30 (1H, t, J=7.2 Hz, CHI<sub>isomer 1 and 2</sub>); 4.43-4.53 (0.5H, m, CHN<sub>isomer 1</sub>); 4.51 (1H, t, J=8.8 Hz, OCHH'<sub>isomer 1 and 2</sub>); 4.59 (0.5H, ddd, J=11.6 Hz, 8.8 Hz, 6.1 Hz, CHN<sub>isomer 2</sub>); 6.36 (0.5H, d, J=6.1 Hz, NH<sub>isomer 1</sub>); 6.43 (0.5H, d, J=6.1 Hz, NH<sub>isomer 2</sub>). **<sup>13</sup>C NMR (75 MHz, CDCl<sub>3</sub>):** δ 14.1 (CH<sub>3</sub>, isomer 1 and 2); 22.6; 28.5; 29.4 and 31.6 ((CH<sub>2</sub>)<sub>4</sub>CH<sub>3</sub>, isomer 1 and 2); 24.97 (CHI<sub>isomer 1</sub>); 25.01 (CHI<sub>isomer 2</sub>); 29.6 (CH<sub>2</sub>CHN<sub>isomer 1</sub>); 29.7 (CH<sub>2</sub>CHN<sub>isomer 2</sub>); 36.4 (CH<sub>2</sub>CHI<sub>isomer 1</sub>); 36.6 (CH<sub>2</sub>CHI<sub>isomer 2</sub>); 49.6 (CHN<sub>isomer 1</sub>); 49.8 (CHN<sub>isomer 2</sub>); 66.3 (CH<sub>2</sub>O<sub>isomer 1 and 2</sub>); 171.4 (NC=O<sub>isomer 1</sub>); 171.5 (NC=O<sub>isomer 2</sub>); 175.3

(OC=O<sub>isomer 1</sub>); 175.4 (OC=O<sub>isomer 2</sub>). **MS (ESI): m/z (%)**: 354 (M+H<sup>+</sup>, 100). **HRMS mass calculated**: C<sub>12</sub>H<sub>20</sub>INO<sub>3</sub>H<sup>+</sup> 354.0566; **obtained**: 354.0559. **IR (cm<sup>-1</sup>)**:  $\nu_{\max}$  1016; 1177 (C-O); 1547 (HN-C=O); 1650 (HN-C=O); 1771 (C=O<sub>lactone</sub>); 2854 (CH); 2923 (CH); 2956 (CH); 3292 (NH). **Chromatography**: EtOAc:PE 4:1 R<sub>f</sub> = 0.54. **Melting Point**: 148°C. Yellowish powder. **Y**: 44%.

### ***N*-(2-iodononanoyl)-(S)-homoserine lactone (8d)**

(IUPAC: 2-iodo-*N*-[(3S)-tetrahydro-2-oxo-3-furanyl]nonanamide)

**<sup>1</sup>H NMR (300 MHz, CDCl<sub>3</sub>)**:  $\delta$  0.88 (3H, t, J=7.2 Hz, CH<sub>3</sub>, isomer 1 and 2); 1.16-1.46 (10H, m, (CH<sub>2</sub>)<sub>5</sub>CH<sub>3</sub>, isomer 1 and 2); 1.99 (2H, q, J=7.2 Hz, CH<sub>2</sub>CHI, isomer 1 and 2); 2.13-2.30 (1H, m, OCH<sub>2</sub>CHH', isomer 1 and 2); 2.78-2.91 (1H, m, OCH<sub>2</sub>CHH', isomer 1 and 2); 4.27-4.37 (1H, m, OCHH', isomer 1 and 2); 4.32 (1H, t, J=7.2 Hz, CHI, isomer 1 and 2); 4.49-4.57 (0.5H, m, CHN<sub>isomer 1</sub>); 4.51 (1H, t, J=8.8 Hz, OCHH', isomer 1 and 2); 4.63 (0.5H, ddd, J=11.8 Hz, 8.5 Hz, 6.1 Hz, CHN<sub>isomer 2</sub>); 6.65 (0.5H, d, J=6.1 Hz, NH<sub>isomer 1</sub>); 6.73 (0.5H, d, J=6.1 Hz, NH<sub>isomer 2</sub>).

**<sup>13</sup>C NMR (75 MHz, CDCl<sub>3</sub>)**:  $\delta$  14.2 (CH<sub>3</sub>, isomer 1 and 2); 22.7; 28.8; 29.1; 29.5 and 31.8 ((CH<sub>2</sub>)<sub>5</sub>CH<sub>3</sub>, isomer 1 and 2); 25.00 (CHI, isomer 1); 25.01 (CHI, isomer 2); 29.7 (CH<sub>2</sub>CHN<sub>isomer 1</sub>); 29.8 (CH<sub>2</sub>CHN<sub>isomer 2</sub>); 36.4 (CH<sub>2</sub>CH<sub>2</sub>CHI, isomer 1); 36.6 (CH<sub>2</sub>CH<sub>2</sub>CHI, isomer 2); 49.7 (CHN<sub>isomer 1</sub>); 49.8 (CHN<sub>isomer 2</sub>); 66.3 (CH<sub>2</sub>O, isomer 1 and 2); 171.3 (NC=O, isomer 1); 171.5 (NC=O, isomer 2); 175.2 (OC=O, isomer 1); 175.3 (OC=O, isomer 2). **MS (ESI): m/z (%)**: 368 (M+H<sup>+</sup>, 100). **HRMS mass calculated**: C<sub>13</sub>H<sub>22</sub>INO<sub>3</sub>H<sup>+</sup> 368.0722; **obtained**: 368.0719. **IR (cm<sup>-1</sup>)**:  $\nu_{\max}$  1014; 1178 (C-O); 1546 (HN-C=O); 1643 (HN-C=O); 1770 (C=O<sub>lactone</sub>);

2852 (CH); 2923 (CH); 2953 (CH); 3289 (NH). **Chromatography:** EtOAc:PE 4:1  $R_f = 0.58$ . **Melting Point:** 138°C. Yellowish powder. **Y:** 48%.

### ***N*-(2-Iododecanoyl)-(S)-homoserine lactone (8e)**

(IUPAC: 2-iodo-*N*-[(3*S*)-tetrahydro-2-oxo-3-furanyl]decanamide)

**<sup>1</sup>H NMR (300 MHz, CDCl<sub>3</sub>):**  $\delta$  0.88 (3H, t,  $J=7.2$  Hz,  $\text{CH}_3$ , isomer 1 and 2); 1.18-1.46 (12H, m,  $(\text{CH}_2)_6\text{CH}_3$ , isomer 1 and 2); 1.99 (2H, q,  $J=7.2$  Hz,  $\text{CH}_2\text{CH}$ , isomer 1 and 2); 2.11-2.28 (1H, m,  $\text{OCH}_2\text{CHH}$ , isomer 1 and 2); 2.81-2.94 (1H, m,  $\text{OCH}_2\text{CHH}$ , isomer 1 and 2); 4.27-4.36 (1H, m,  $\text{OCHH}$ , isomer 1 and 2); 4.31 (1H, t,  $J=7.4$  Hz,  $\text{CH}$ , isomer 1 and 2); 4.46-4.55 (0.5H, m,  $\text{CHN}$ , isomer 1); 4.51 (1H, t,  $J=8.8$  Hz,  $\text{OCHH}$ , isomer 1 and 2); 4.60 (0.5H, ddd,  $J=11.6$  Hz, 8.8 Hz, 6.1 Hz,  $\text{CHN}$ , isomer 2); 6.45 (0.5H, d,  $J=6.1$  Hz,  $\text{NH}$ , isomer 1); 6.53 (0.5H, d,  $J=6.1$  Hz,  $\text{NH}$ , isomer 2).

**<sup>13</sup>C NMR (75 MHz, CDCl<sub>3</sub>):**  $\delta$  14.2 ( $\text{CH}_3$ , isomer 1 and 2); 22.7; 28.81; 28.84; 29.4; 29.5 and 31.9 ( $(\text{CH}_2)_6\text{CH}_3$ , isomer 1 and 2); 24.9 ( $\text{CH}$ , isomer 1); 25.0 ( $\text{CH}$ , isomer 2); 29.8 ( $\text{CH}_2\text{CHN}$ , isomer 1); 29.9 ( $\text{CH}_2\text{CHN}$ , isomer 2); 36.5 ( $\text{CH}_2\text{CH}$ , isomer 1); 36.6 ( $\text{CH}_2\text{CH}$ , isomer 2); 49.7 ( $\text{CHN}$ , isomer 1); 49.9 ( $\text{CHN}$ , isomer 2); 66.2 ( $\text{CH}_2\text{O}$ , isomer 1 and 2); 171.3 ( $\text{NC=O}$ , isomer 1); 171.4 ( $\text{NC=O}$ , isomer 2); 175.1 ( $\text{OC=O}$ , isomer 1); 175.2 ( $\text{OC=O}$ , isomer 2). **MS (ESI):**  $m/z$  (%): 382 ( $\text{M}+\text{H}^+$ , 100). **HRMS**

**mass calculated:**  $\text{C}_{14}\text{H}_{24}\text{INO}_3\text{H}^+$  382.0879; **obtained:** 382.0870. **IR (cm<sup>-1</sup>):**  $\nu_{\text{max}}$  1185 (C-O); 1542 (HN-C=O); 1644 (HN-C=O); 1769 (C=O<sub>lactone</sub>); 2850 (CH); 2919 (CH); 2956 (CH); 3286 (NH). **Chromatography:** EtOAc:PE 3:2  $R_f = 0.64$ . **Melting Point:** 142°C. Yellowish powder. **Y:** 59%.

### ***N*-(2-Iodododecanoyl)-(S)-homoserine lactone (8f)**

(IUPAC: 2-iodo-*N*-[(3*S*)-tetrahydro-2-oxo-3-furanyl]dodecanamide)



**<sup>1</sup>H NMR (300 MHz, CDCl<sub>3</sub>):** δ 0.88 (3H, t, J=7.2 Hz, CH<sub>3</sub>, isomer 1 and 2); 1.16-1.47 (16H, m, (CH<sub>2</sub>)<sub>8</sub>CH<sub>3</sub>, isomer 1 and 2); 1.99 (2H, q, J=7.2 Hz, CH<sub>2</sub>CH, isomer 1 and 2); 2.09-2.26 (1H, m, OCH<sub>2</sub>CHH', isomer 1 and 2); 2.83-2.96 (1H, m, OCH<sub>2</sub>CHH', isomer 1 and 2); 4.24-4.35 (1H, m, OCHH', isomer 1 and 2); 4.28 (1H, t, J=7.2 Hz, CH, isomer 1 and 2); 4.43-4.53 (0.5H, m, CHN, isomer 1); 4.50 (1H, t, J=8.8 Hz, OCHH', isomer 1 and 2); 4.57 (0.5H, ddd, J=11.6 Hz, 8.8 Hz, 6.1 Hz, CHN, isomer 2); 6.27 (0.5H, d, J=6.1 Hz, NH, isomer 1); 6.34 (0.5H, d, J=6.1 Hz, NH, isomer 2). **<sup>13</sup>C NMR (75 MHz, CDCl<sub>3</sub>):** δ 14.2 (CH<sub>3</sub>, isomer 1 and 2); 22.8; 28.8; 29.4; 29.5; 29.58; 29.63; 29.8 and 32.0 ((CH<sub>2</sub>)<sub>8</sub>CH<sub>3</sub>, isomer 1 and 2); 24.9 (CH, isomer 1); 25.0 (CH, isomer 2); 30.0 (CH<sub>2</sub>CHN, isomer 1); 30.1 (CH<sub>2</sub>CHN, isomer 2); 36.5 (CH<sub>2</sub>CH, isomer 1); 36.7 (CH<sub>2</sub>CH, isomer 2); 49.8 (CHN, isomer 1); 50.0 (CHN, isomer 2); 66.2 (CH<sub>2</sub>O, isomer 1 and 2); 171.1 (NC=O, isomer 1); 171.3 (NC=O, isomer 2); 175.1 (OC=O, isomer 1 and 2). **MS (ESI): m/z (%):** 410 (M+H<sup>+</sup>, 100). **HRMS mass calculated:** C<sub>16</sub>H<sub>28</sub>INO<sub>3</sub>H<sup>+</sup> 410.1192; **obtained:** 410.1183. **IR (cm<sup>-1</sup>):** ν<sub>max</sub> 1181 (C-O); 1542 (HN-C=O); 1643 (HN-C=O); 1770 (C=O<sub>lactone</sub>); 2850 (CH); 2919 (CH); 2955 (CH) 3287 (NH). **Chromatography:** EtOAc:PE 3:2 R<sub>f</sub> = 0.61. **Melting Point:** 143°C. Yellowish powder. **Y:** 12%.

### ***N*-(2-Chloroheptanoyl)-(S)-homoserine lactone (11b)**

(IUPAC: 2-chloro-*N*-[(3*S*)-tetrahydro-2-oxo-3-furanyl]heptanamide)

**<sup>1</sup>H NMR (300 MHz, CDCl<sub>3</sub>):** δ 0.90 (3H, t, J=7.2 Hz, CH<sub>3</sub>, isomer 1 and 2); 1.26-1.35 (4H, m, (CH<sub>2</sub>)<sub>2</sub>CH<sub>3</sub>, isomer 1 and 2); 1.43-1.54 (2H, m, CH<sub>2</sub>(CH<sub>2</sub>)<sub>2</sub>CH<sub>3</sub>, isomer 1 and 2); 1.88-2.02 (1H, m, CHH'CHCl, isomer 1 and 2); 2.05-2.16 (1H, m, CHH'CHCl, isomer 1 and 2); 2.21 (1H, dddd, J=11.8 Hz, 11.8 Hz, 11.7 Hz, 8.8 Hz, OCH<sub>2</sub>CHH', isomer 1 and 2); 2.80-2.89 (1H, m, OCH<sub>2</sub>CHH', isomer 1 and 2); 4.26-4.40 (2H, m, CHCl, isomer 1 and 2 and OCHH', isomer 1 and 2); 4.48-4.53 (0.5H, m,

$\text{CHN}_{\text{isomer 1}}$ ); 4.51 (1H, t,  $J=8.8$  Hz,  $\text{OCHH}'_{\text{isomer 1 and 2}}$ ); 4.56 (0.5H, ddd,  $J=11.3$  Hz, 8.8 Hz, 6.1 Hz,  $\text{CHN}_{\text{isomer 2}}$ ); 7.05 (0.5H, d,  $J=6.1$  Hz,  $\text{NH}_{\text{isomer 1}}$ ); 7.09 (0.5H, d,  $J=6.1$  Hz,  $\text{NH}_{\text{isomer 2}}$ ).  **$^{13}\text{C}$  NMR (75 MHz,  $\text{CDCl}_3$ ):**  $\delta$  14.0 ( $\text{CH}_3$ , isomer 1 and 2); 22.5; 25.5; 25.6 and 31.0 ( $(\text{CH}_2)_3\text{CH}_3$ , isomer 1 and 2); 29.8 ( $\text{CH}_2\text{CHN}_{\text{isomer 1 and 2}}$ ); 35.4 ( $\text{CH}_2\text{CHCl}_{\text{isomer 1 and 2}}$ ); 49.49 ( $\text{CHN}_{\text{isomer 1}}$ ); 49.54 ( $\text{CHN}_{\text{isomer 2}}$ ); 60.58 ( $\text{CHCl}_{\text{isomer 1}}$ ); 60.64 ( $\text{CHCl}_{\text{isomer 2}}$ ); 66.06 ( $\text{CH}_2\text{O}_{\text{isomer 1}}$ ); 66.11 ( $\text{CH}_2\text{O}_{\text{isomer 2}}$ ); 169.96 ( $\text{NC=O}_{\text{isomer 1}}$ ); 170.00 ( $\text{NC=O}_{\text{isomer 2}}$ ); 174.7 ( $\text{OC=O}_{\text{isomer 1}}$ ); 174.8 ( $\text{OC=O}_{\text{isomer 2}}$ ). **MS (ESI):  $m/z$  (%):** 248/250 ( $\text{M}+\text{H}^+$ , 100). **HRMS mass calculated:**  $\text{C}_{11}\text{H}_{18}\text{ClNO}_3\text{H}^+$  248.1053; **obtained:** 248.1045. **IR ( $\text{cm}^{-1}$ ):**  $\nu_{\text{max}}$  1015; 1174 (C-O); 1549 (HN-C=O); 1652 (HN-C=O); 1770 (C=O<sub>lactone</sub>); 2859 (CH); 2928 (CH); 2955 (CH); 3296 (NH). **Chromatography:** EtOAc:PE 4:1  $R_f$  = 0.47. **Melting Point:** 148°C. White powder. **Y:** 44%.

### ***N*-(2-Chlorooctanoyl)-(S)-homoserine lactone (11c)**

(IUPAC: 2-chloro-*N*-[(3*S*)-tetrahydro-2-oxo-3-furanyl]octanamide)

**$^1\text{H}$  NMR (300 MHz,  $\text{CDCl}_3$ ):**  $\delta$  0.88 (3H, t,  $J=7.2$  Hz,  $\text{CH}_3$ , isomer 1 and 2); 1.20-1.41 (6H, m,  $(\text{CH}_2)_3\text{CH}_3$ , isomer 1 and 2); 1.42-1.55 (2H, m,  $\text{CH}_2(\text{CH}_2)_3\text{CH}_3$ , isomer 1 and 2); 1.87-2.01 (1H, m,  $\text{CHH}'\text{CHCl}_{\text{isomer 1 and 2}}$ ); 2.05-2.14 (1H, m,  $\text{CHH}'\text{CHCl}_{\text{isomer 1 and 2}}$ ); 2.22 (1H, dddd,  $J=11.8$  Hz, 11.8 Hz, 11.7 Hz, 8.8 Hz,  $\text{OCH}_2\text{CHH}'_{\text{isomer 1 and 2}}$ ); 2.79-2.88 (1H, m,  $\text{OCH}_2\text{CHH}'_{\text{isomer 1 and 2}}$ ); 4.27-4.40 (2H, m,  $\text{CHCl}_{\text{isomer 1 and 2}}$  and  $\text{OCHH}'_{\text{isomer 1 and 2}}$ ); 4.50 (1H, t,  $J=8.8$  Hz,  $\text{OCHH}'_{\text{isomer 1 and 2}}$ ); 4.53-4.62 (1H, m,  $\text{CHN}_{\text{isomer 1 and 2}}$ ); 7.08 (0.5H, d,  $J=6.1$  Hz,  $\text{NH}_{\text{isomer 1}}$ ); 7.12 (0.5H, d,  $J=6.1$  Hz,  $\text{NH}_{\text{isomer 2}}$ ).  **$^{13}\text{C}$  NMR (75 MHz,  $\text{CDCl}_3$ ):**  $\delta$  14.1 ( $\text{CH}_3$ , isomer 1 and 2); 22.6; 25.77; 25.84; 28.5 and 31.5 ( $(\text{CH}_2)_4\text{CH}_3$ , isomer 1 and 2); 29.9 ( $\text{CH}_2\text{CHN}_{\text{isomer 1}}$ ); 30.0 ( $\text{CH}_2\text{CHN}_{\text{isomer 2}}$ ); 35.5 ( $\text{CH}_2\text{CHCl}_{\text{isomer 1 and 2}}$ ); 49.5 ( $\text{CHN}_{\text{isomer 1}}$ ); 49.6 ( $\text{CHN}_{\text{isomer 2}}$ );

60.6 ( $\underline{\text{CHCl}}$ <sub>isomer 1</sub>); 60.7 ( $\underline{\text{CHCl}}$ <sub>isomer 2</sub>); 66.07 ( $\underline{\text{CH}_2\text{O}}$ <sub>isomer 1</sub>); 66.12 ( $\underline{\text{CH}_2\text{O}}$ <sub>isomer 2</sub>); 170.1 ( $\underline{\text{NC=O}}$ <sub>isomer 1 and 2</sub>); 174.8 ( $\underline{\text{OC=O}}$ <sub>isomer 1 and 2</sub>). **MS (ESI): m/z (%):** 262/264 (M+H<sup>+</sup>, 100). **HRMS mass calculated:** C<sub>12</sub>H<sub>20</sub>ClNO<sub>3</sub>H<sup>+</sup> 262.1210; **obtained:** 262.1206. **IR (cm<sup>-1</sup>):**  $\nu_{\text{max}}$  1008; 1173 (C-O); 1552 (HN-C=O); 1656 (HN-C=O); 1770 (C=O<sub>lactone</sub>); 2857 (CH); 2922 (CH); 2955 (CH); 3300 (NH). **Chromatography:** EtOAc:PE 4:1 R<sub>f</sub> = 0.51. **Melting Point:** 146°C. White powder. **Y:** 35%.

### ***N*-(2-Chlorononanoyl)-(*S*)-homoserine lactone (11d)**

(IUPAC: 2-chloro-*N*-[(3*S*)-tetrahydro-2-oxo-3-furanyl]nonanamide)

**<sup>1</sup>H NMR (300 MHz, CDCl<sub>3</sub>):**  $\delta$  0.88 (3H, t, J=7.2 Hz,  $\underline{\text{CH}}_3$ , isomer 1 and 2); 1.19-1.39 (8H, m, ( $\underline{\text{CH}}_2$ )<sub>4</sub>CH<sub>3</sub>, isomer 1 and 2); 1.40-1.55 (2H, m,  $\underline{\text{CH}}_2(\text{CH}_2)_4\text{CH}_3$ , isomer 1 and 2); 1.87-2.01 (1H, m,  $\underline{\text{CH}}\text{H}'\text{CHCl}$  isomer 1 and 2); 2.05-2.16 (1H, m,  $\underline{\text{CH}}\text{H}'\text{CHCl}$  isomer 1 and 2); 2.21 (1H, dddd, J=11.8 Hz, 11.8 Hz, 11.7 Hz, 8.8 Hz, OCH<sub>2</sub> $\underline{\text{CH}}\text{H}'$  isomer 1 and 2); 2.80-2.89 (1H, m, OCH<sub>2</sub> $\underline{\text{CH}}\text{H}'$  isomer 1 and 2); 4.26-4.40 (2H, m,  $\underline{\text{CHCl}}$  isomer 1 and 2 and OCH $\underline{\text{H}}'$  isomer 1 and 2); 4.49-4.61 (1H, m,  $\underline{\text{CHN}}$  isomer 1 and 2); 4.50 (1H, t, J=8.8 Hz, OCH $\underline{\text{H}}'$  isomer 1 and 2); 7.05 (0.5H, d, J=6.1 Hz,  $\underline{\text{NH}}$  isomer 1); 7.09 (0.5H, d, J=6.1 Hz,  $\underline{\text{NH}}$  isomer 2). **<sup>13</sup>C NMR (75 MHz, CDCl<sub>3</sub>):**  $\delta$  14.1 ( $\underline{\text{CH}}_3$ , isomer 1 and 2); 22.7; 25.8; 25.9; 28.9; 29.1 and 31.8 (( $\underline{\text{CH}}_2$ )<sub>5</sub>CH<sub>3</sub>, isomer 1 and 2); 29.9 ( $\underline{\text{CH}}_2\text{CHN}$  isomer 1 and 2); 35.5 ( $\underline{\text{CH}}_2\text{CHCl}$  isomer 1 and 2); 49.5 ( $\underline{\text{CHN}}$  isomer 1); 49.6 ( $\underline{\text{CHN}}$  isomer 2); 60.6 ( $\underline{\text{CHCl}}$  isomer 1); 60.7 ( $\underline{\text{CHCl}}$  isomer 2); 66.0 ( $\underline{\text{CH}_2\text{O}}$  isomer 1); 66.1 ( $\underline{\text{CH}_2\text{O}}$  isomer 2); 169.96 ( $\underline{\text{NC=O}}$  isomer 1); 169.99 ( $\underline{\text{NC=O}}$  isomer 2); 174.7 ( $\underline{\text{OC=O}}$  isomer 1); 174.8 ( $\underline{\text{OC=O}}$  isomer 2). **MS (ESI): m/z (%):** 276/278 (M+H<sup>+</sup>, 100). **HRMS mass calculated:** C<sub>13</sub>H<sub>22</sub>ClNO<sub>3</sub>H<sup>+</sup> 276.1366; **obtained:** 276.1362. **IR (cm<sup>-1</sup>):**  $\nu_{\text{max}}$  1014; 1173 (C-O); 1553 (HN-C=O); 1660 (HN-C=O); 1770 (C=O<sub>lactone</sub>); 2853 (CH); 2922 (CH); 2954 (CH); 3304 (NH).

**Chromatography:** EtOAc:PE 4:1  $R_f = 0.50$ . **Melting Point:** 149°C. White powder. **Y:** 36%.

***N*-(2-Chlorodecanoyl)-(S)-homoserine lactone (11e)**

(IUPAC: 2-chloro-*N*-[(3*S*)-tetrahydro-2-oxo-3-furanyl]decanamide)

**$^1\text{H}$  NMR (300 MHz,  $\text{CDCl}_3$ ):**  $\delta$  0.88 (3H, t,  $J=7.2$  Hz,  $\text{CH}_3$ , isomer 1 and 2); 1.19-1.39 (10H, m,  $(\text{CH}_2)_5\text{CH}_3$ , isomer 1 and 2); 1.40-1.55 (2H, m,  $\text{CH}_2(\text{CH}_2)_5\text{CH}_3$ , isomer 1 and 2); 1.87-2.01 (1H, m,  $\text{CHH}'\text{CHCl}$ , isomer 1 and 2); 2.05-2.13 (1H, m,  $\text{CHH}'\text{CHCl}$ , isomer 1 and 2); 2.20 (1H, dddd,  $J=11.7$  Hz, 11.7 Hz, 11.7 Hz, 8.8 Hz,  $\text{OCH}_2\text{CHH}'$ , isomer 1 and 2); 2.81-2.90 (1H, m,  $\text{OCH}_2\text{CHH}'$ , isomer 1 and 2); 4.26-4.40 (2H, m,  $\text{CHCl}$ , isomer 1 and 2 and  $\text{OCHH}'$ , isomer 1 and 2); 4.50 (1H, t,  $J=8.8$  Hz,  $\text{OCHH}'$ , isomer 1 and 2); 4.52-4.59 (1H, m,  $\text{CHN}$ , isomer 1 and 2); 7.02 (0.5H, d,  $J=6.1$  Hz,  $\text{NH}$ , isomer 1); 7.05 (0.5H, d,  $J=6.1$  Hz,  $\text{NH}$ , isomer 2).  **$^{13}\text{C}$  NMR (75 MHz,  $\text{CDCl}_3$ ):**  $\delta$  14.2 ( $\text{CH}_3$ , isomer 1 and 2); 22.7; 25.8; 25.9; 28.9; 29.4 and 31.9 ( $(\text{CH}_2)_6\text{CH}_3$ , isomer 1 and 2); 29.9 ( $\text{CH}_2\text{CHN}$ , isomer 1 and 2); 35.5 ( $\text{CH}_2\text{CHCl}$ , isomer 1 and 2); 49.5 ( $\text{CHN}$ , isomer 1); 49.6 ( $\text{CHN}$ , isomer 2); 60.6 ( $\text{CHCl}$ , isomer 1); 60.7 ( $\text{CHCl}$ , isomer 2); 66.0 ( $\text{CH}_2\text{O}$ , isomer 1); 66.1 ( $\text{CH}_2\text{O}$ , isomer 2); 169.95 ( $\text{NC}=\text{O}$ , isomer 1); 170.00 ( $\text{NC}=\text{O}$ , isomer 2); 174.7 ( $\text{OC}=\text{O}$ , isomer 1); 174.8 ( $\text{OC}=\text{O}$ , isomer 2). **MS (ESI):  $m/z$  (%):** 290/292 ( $\text{M}+\text{H}^+$ , 100). **HRMS mass calculated:**  $\text{C}_{14}\text{H}_{24}\text{ClNO}_3\text{H}^+$  290.1523; **obtained:** 290.1518. **IR ( $\text{cm}^{-1}$ ):**  $\nu_{\text{max}}$  1008; 1175 (C-O); 1555 (HN-C=O); 1657 (HN-C=O); 1770 (C=O<sub>lactone</sub>); 2850 (CH); 2920 (CH); 2955 (CH); 3301 (NH). **Chromatography:** EtOAc:PE 4:1  $R_f = 0.50$ . **Melting Point:** 149°C. White powder. **Y:** 40%.

***N*-(2-Chlorododecanoyl)-(S)-homoserine lactone (11f)**

(IUPAC: 2-chloro-*N*-[(3*S*)-tetrahydro-2-oxo-3-furanyl]dodecanamide)

**$^1\text{H}$  NMR (300 MHz,  $\text{CDCl}_3$ ):**  $\delta$  0.88 (3H, t,  $J=7.2$  Hz,  $\text{CH}_3$ , isomer 1 and 2); 1.18-1.38 (14H, m,  $(\text{CH}_2)_7\text{CH}_3$ , isomer 1 and 2); 1.39-1.55 (2H, m,  $\text{CH}_2(\text{CH}_2)_7\text{CH}_3$ , isomer 1 and 2); 1.87-2.01 (1H, m,  $\text{CHH}'\text{CHCl}$ , isomer 1 and 2); 2.05-2.14 (1H, m,  $\text{CHH}'\text{CHCl}$ , isomer 1 and 2); 2.20 (1H, dddd,  $J=11.8$  Hz, 11.8 Hz, 11.7 Hz, 8.8 Hz,  $\text{OCH}_2\text{CHH}'$ , isomer 1 and 2); 2.80-2.90 (1H, m,  $\text{OCH}_2\text{CHH}'$ , isomer 1 and 2); 4.26-4.40 (2H, m,  $\text{CHCl}$ , isomer 1 and 2 and  $\text{OCHH}'$ , isomer 1 and 2); 4.50 (1H, t,  $J=8.8$  Hz,  $\text{OCHH}'$ , isomer 1 and 2); 4.52-4.60 (1H, m,  $\text{CHN}$ , isomer 1 and 2); 7.01 (0.5H, d,  $J=6.1$  Hz,  $\text{NH}$ , isomer 1); 7.05 (0.5H, d,  $J=6.1$  Hz,  $\text{NH}$ , isomer 2).  **$^{13}\text{C}$  NMR (75 MHz,  $\text{CDCl}_3$ ):**  $\delta$  14.2 ( $\text{CH}_3$ , isomer 1 and 2); 22.8; 25.9; 28.9; 29.39; 29.41; 29.60; 29.63 and 32.0 ( $(\text{CH}_2)_8\text{CH}_3$ , isomer 1 and 2); 29.9 ( $\text{CH}_2\text{CHN}$ , isomer 1 and 2); 35.5 ( $\text{CH}_2\text{CHCl}$ , isomer 1 and 2); 49.5 ( $\text{CHN}$ , isomer 1); 49.6 ( $\text{CHN}$ , isomer 2); 60.6 ( $\text{CHCl}$ , isomer 1); 60.7 ( $\text{CHCl}$ , isomer 2); 66.06 ( $\text{CH}_2\text{O}$ , isomer 1); 66.10 ( $\text{CH}_2\text{O}$ , isomer 2); 170.0 ( $\text{NC}=\text{O}$ , isomer 1 and 2); 174.7 ( $\text{OC}=\text{O}$ , isomer 1); 174.8 ( $\text{OC}=\text{O}$ , isomer 2). **MS (ESI):  $m/z$  (%):** 318/320 ( $\text{M}+\text{H}^+$ , 100). **HRMS mass calculated:**  $\text{C}_{16}\text{H}_{28}\text{ClNO}_3\text{H}^+$  318.1836; **obtained:** 318.1827. **IR ( $\text{cm}^{-1}$ ):**  $\nu_{\text{max}}$  1008; 1176 (C-O); 1553 (HN-C=O); 1660 (HN-C=O); 1770 (C=O<sub>lactone</sub>); 2850 (CH); 2919 (CH); 2955 (CH); 3302 (NH). **Chromatography:** EtOAc:PE 4:1  $R_f$  = 0.52. **Melting Point:** 150°C. White powder. **Y:** 39%.

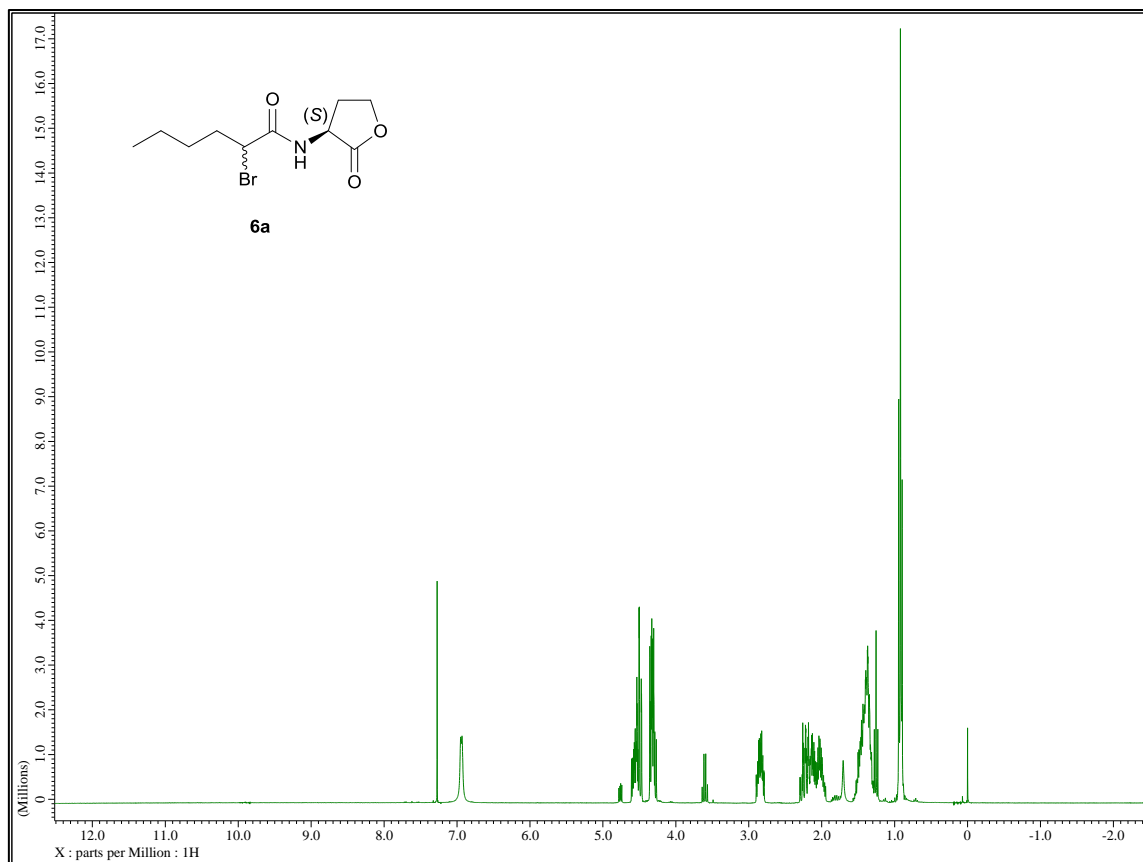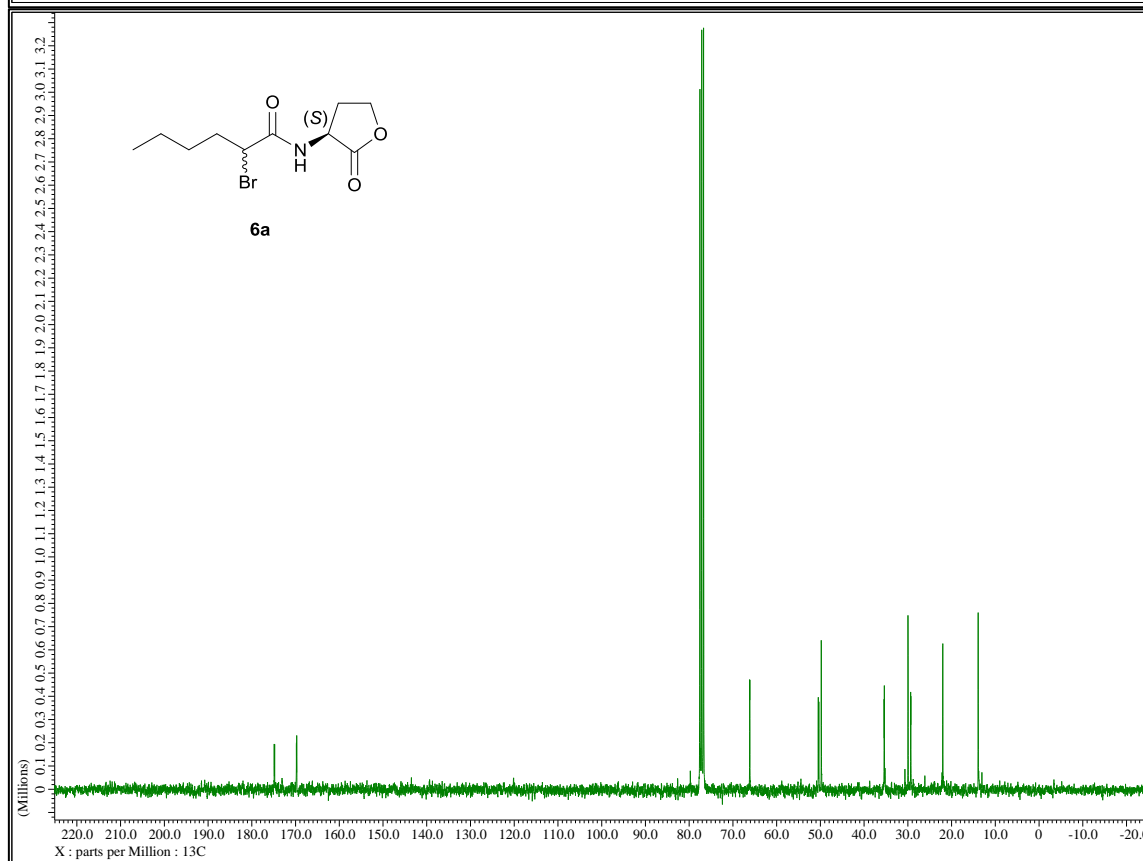

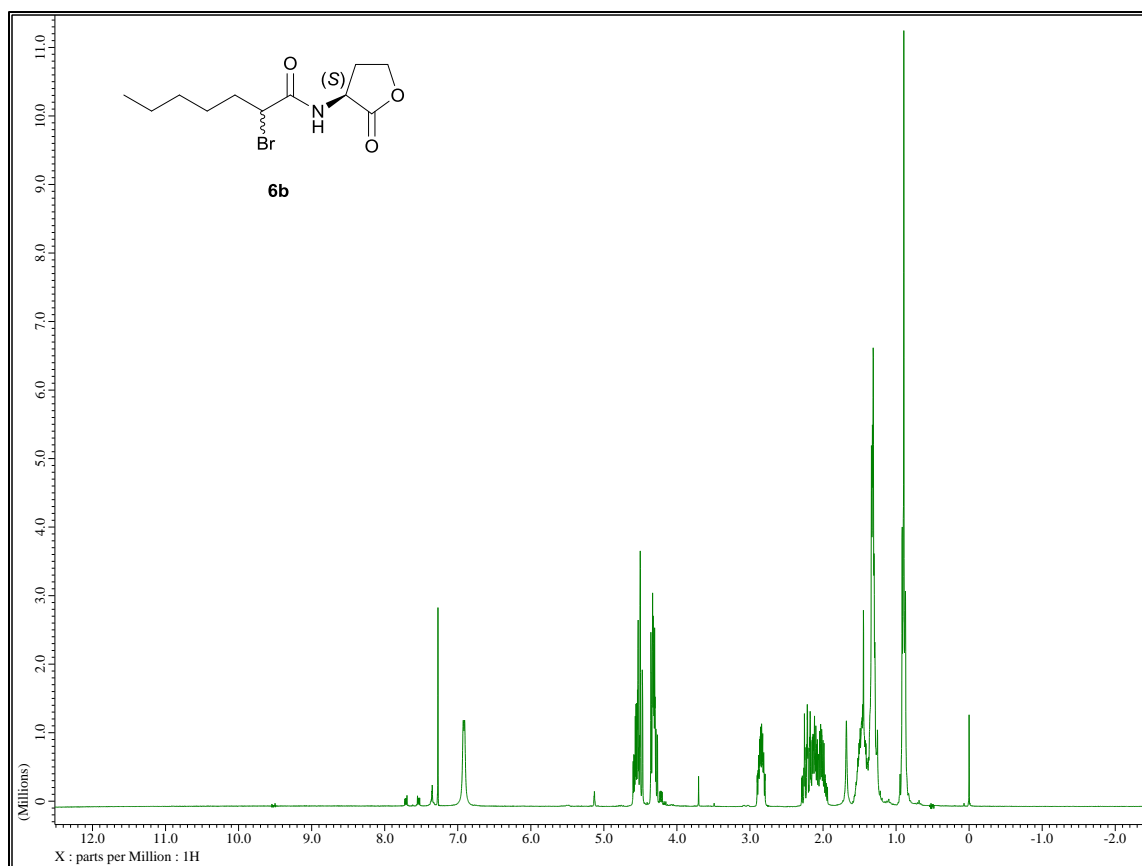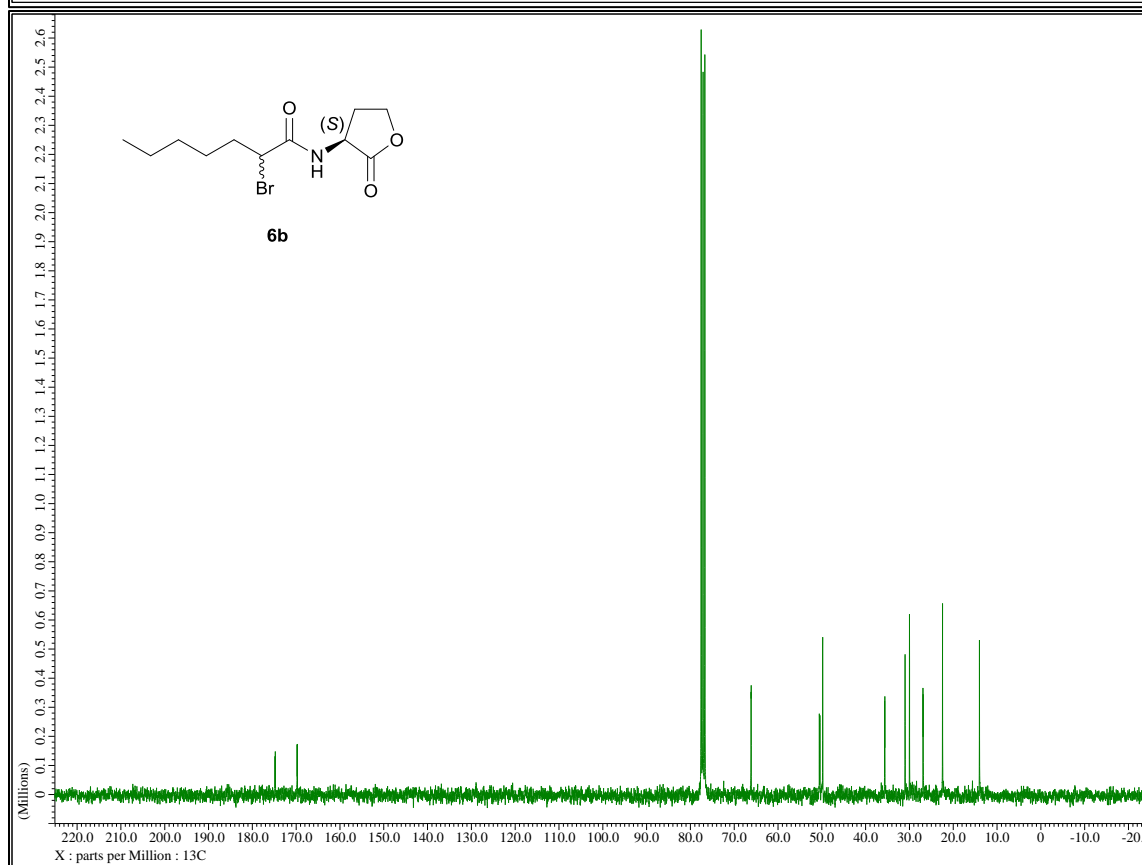

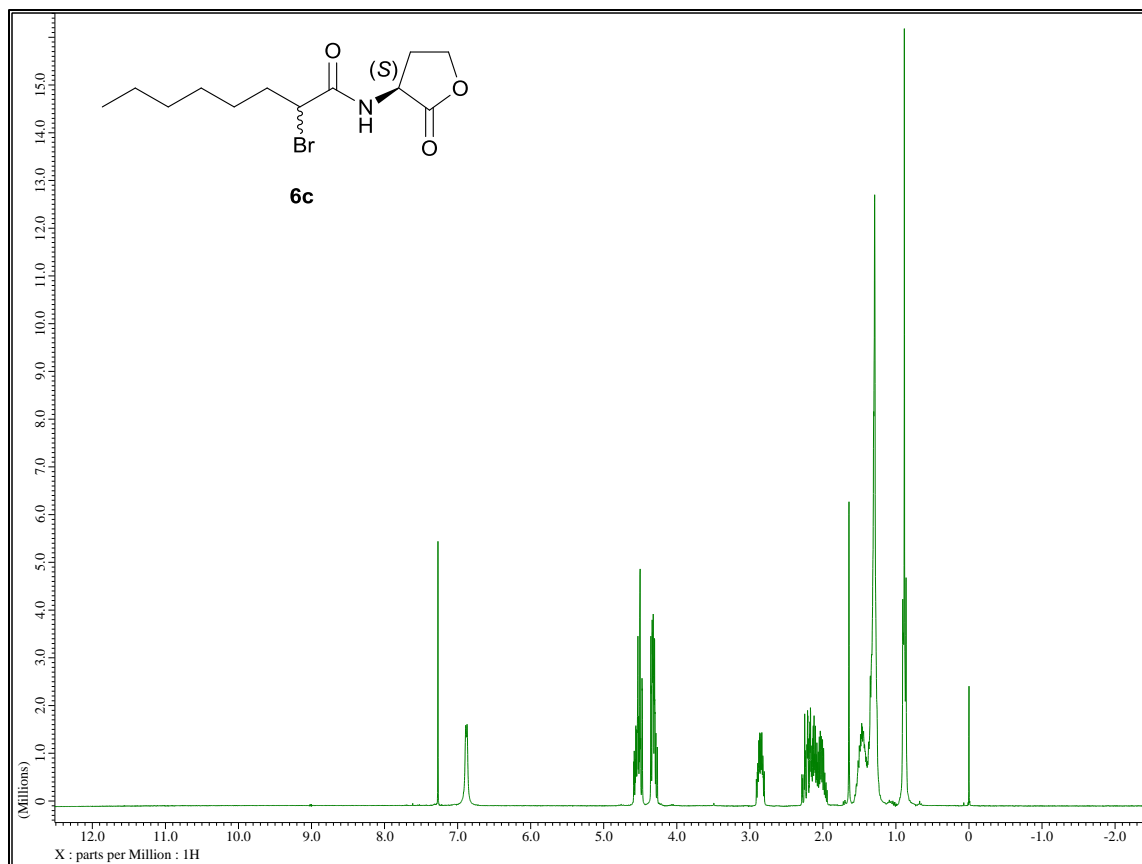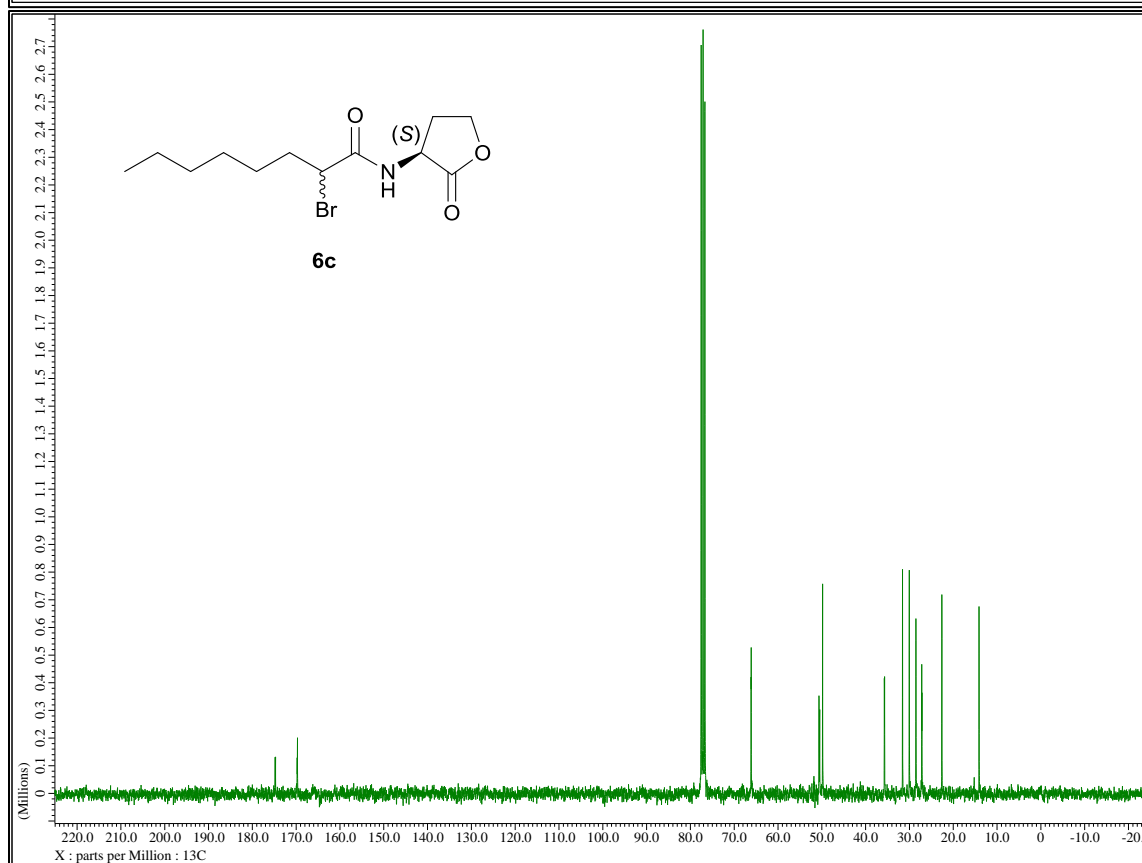



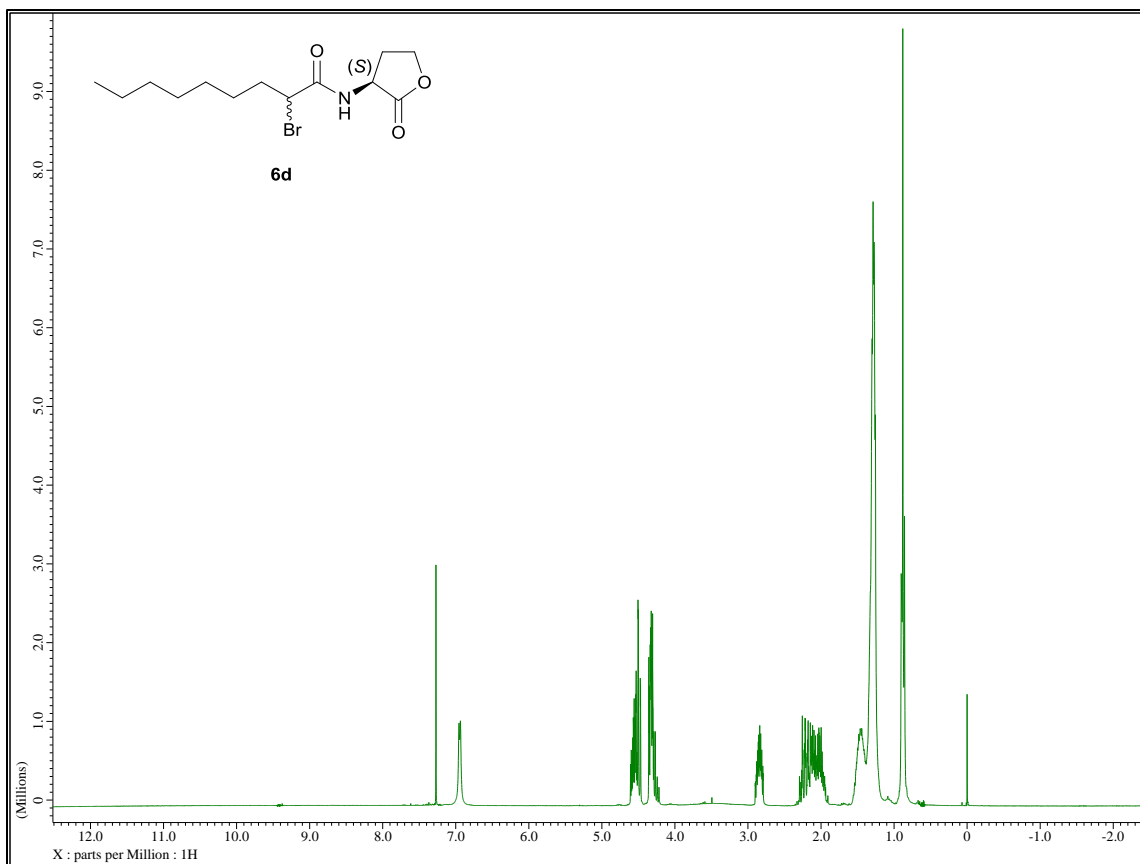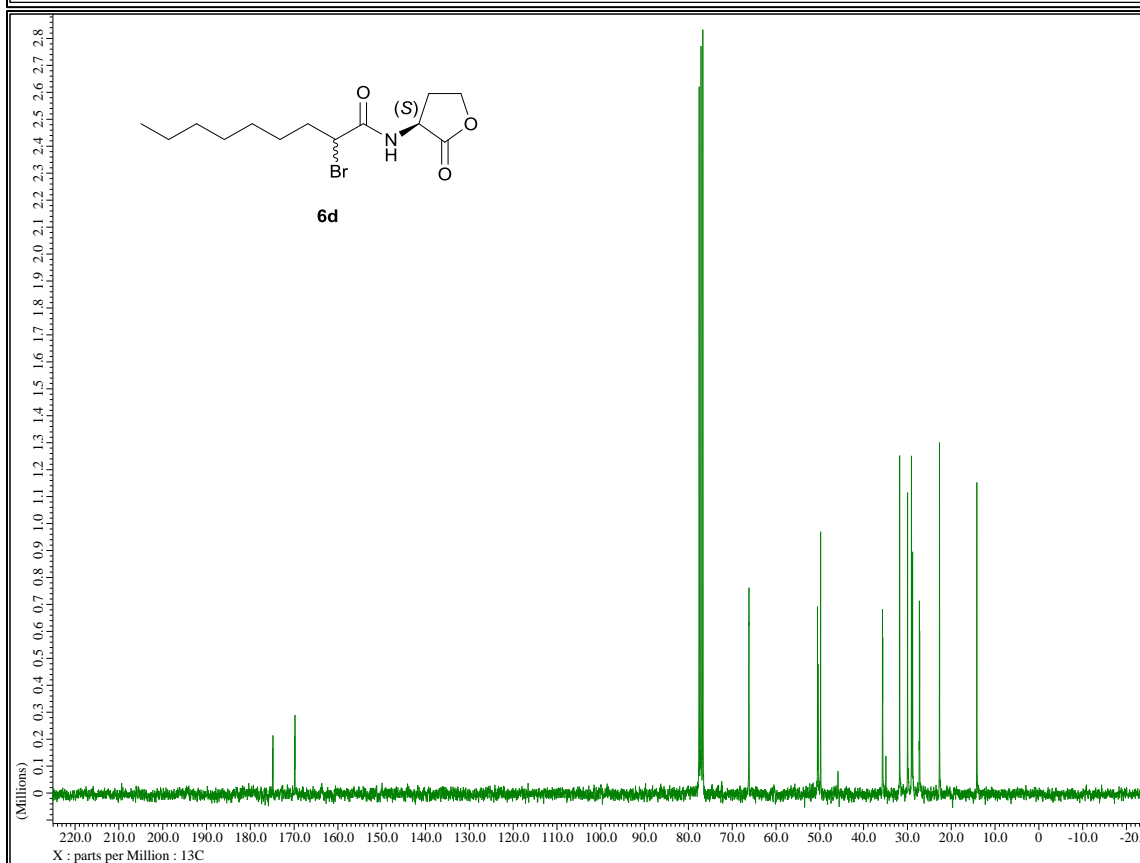

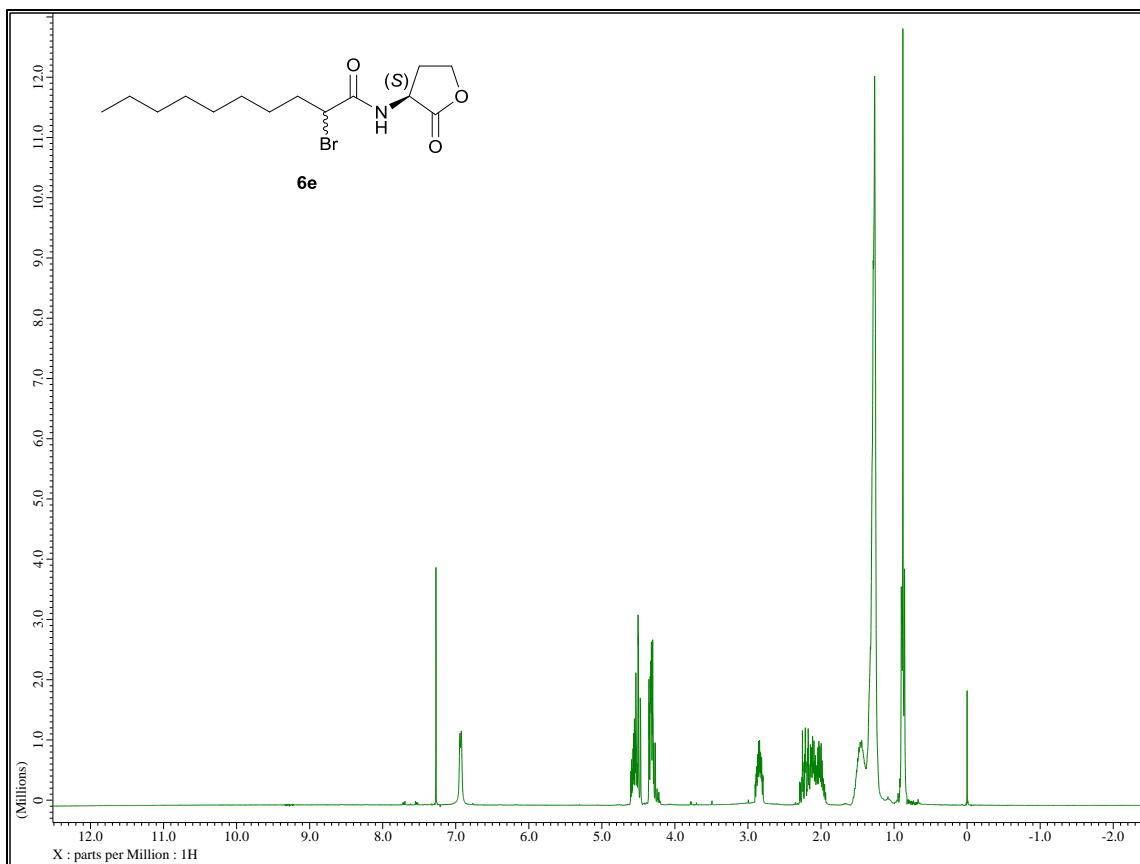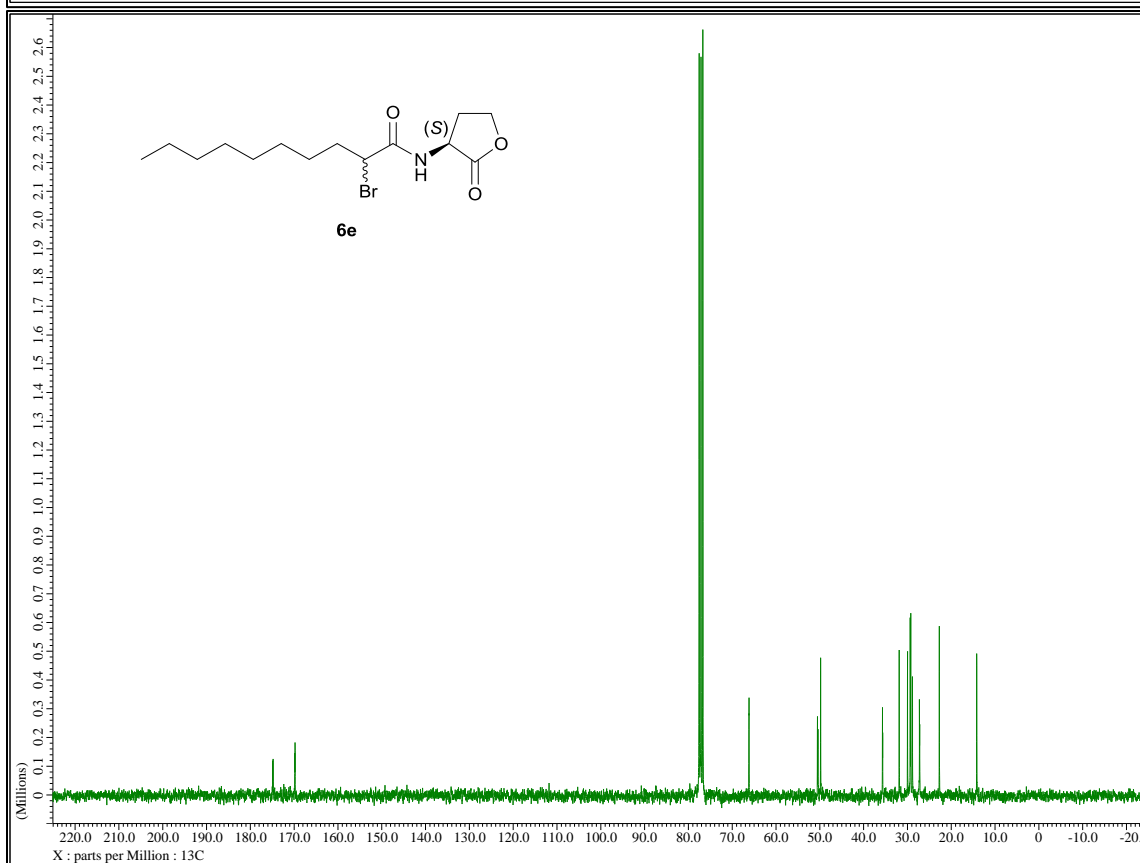

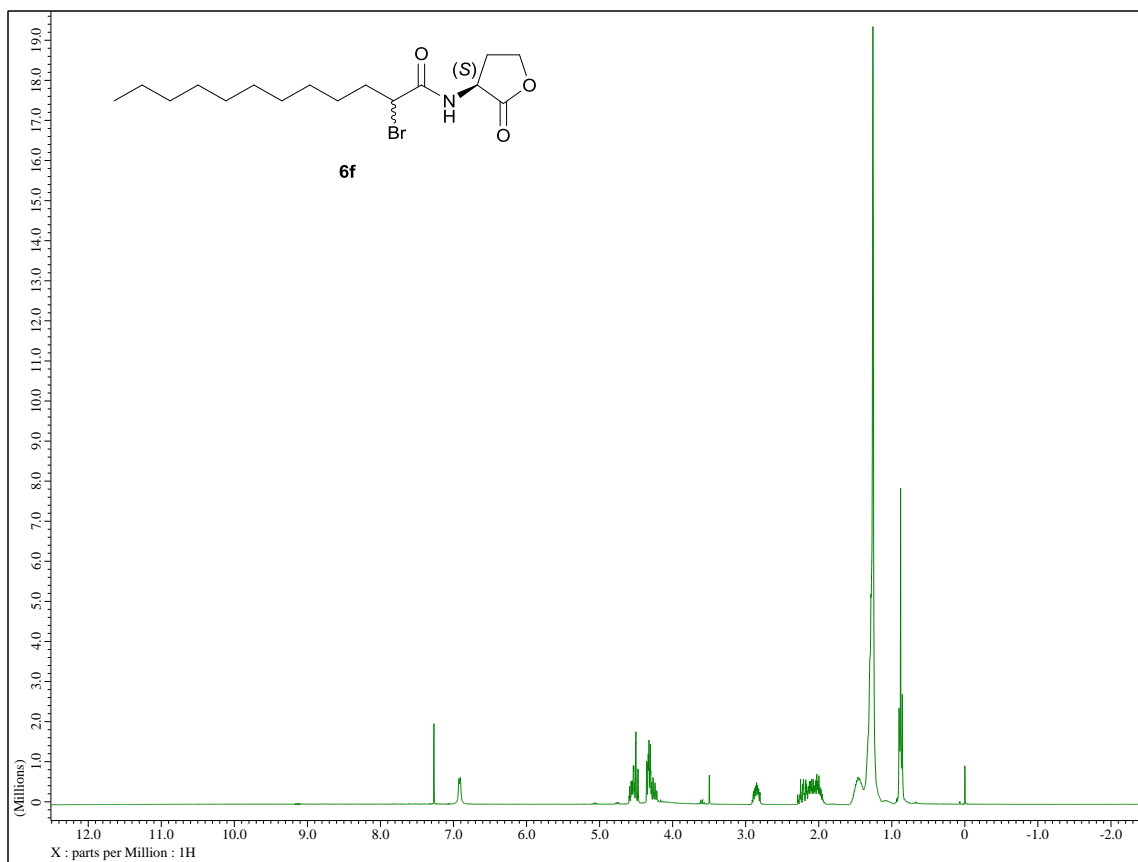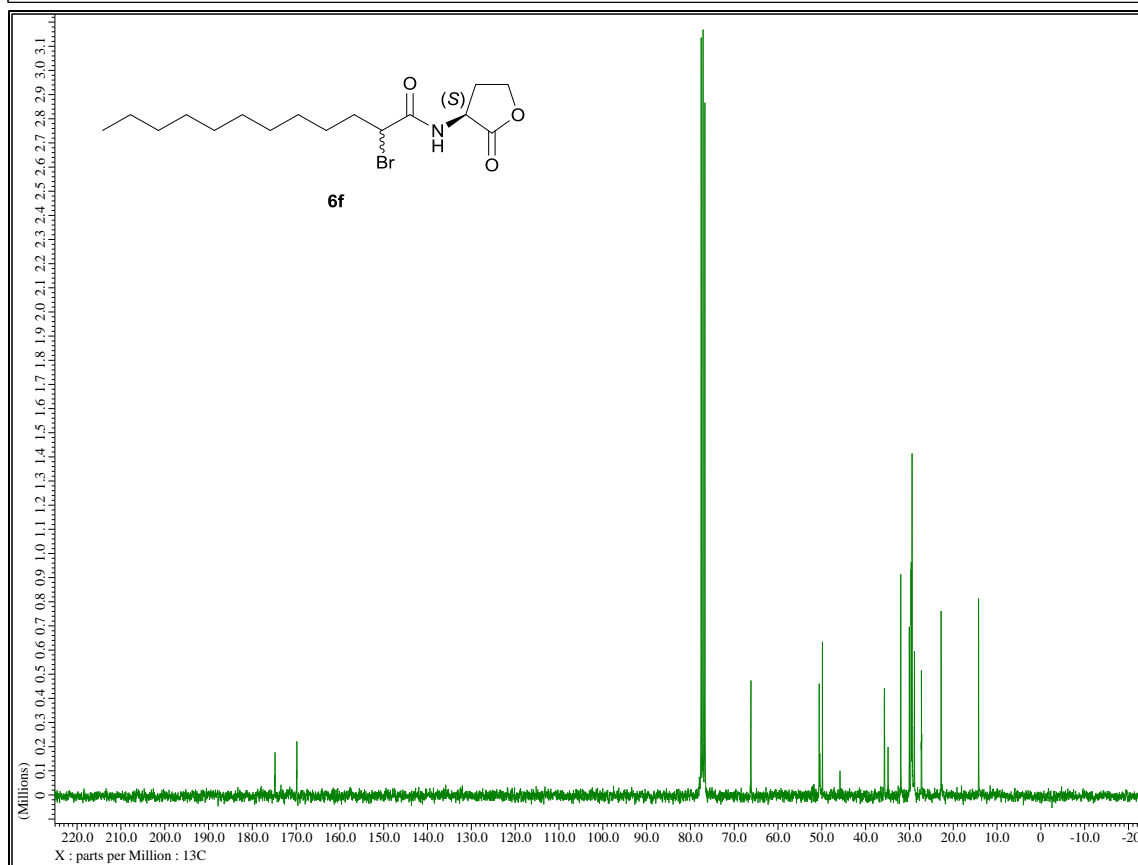

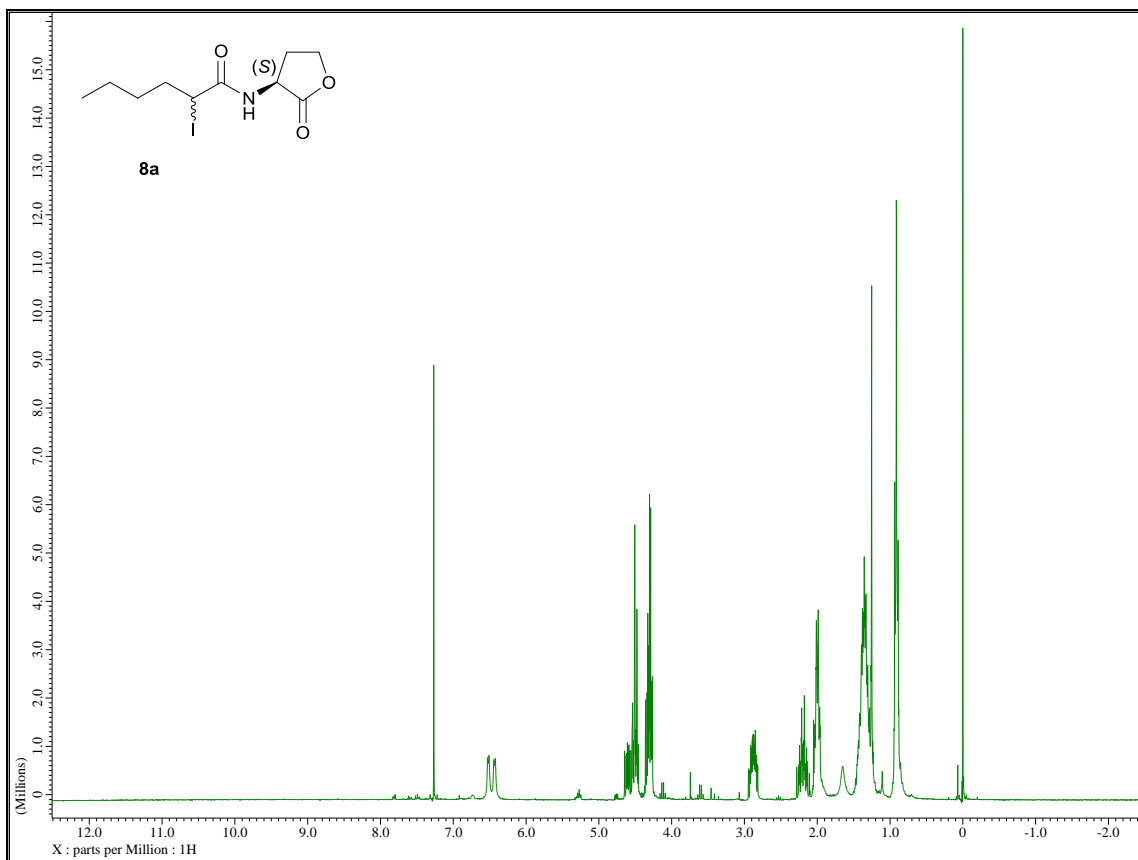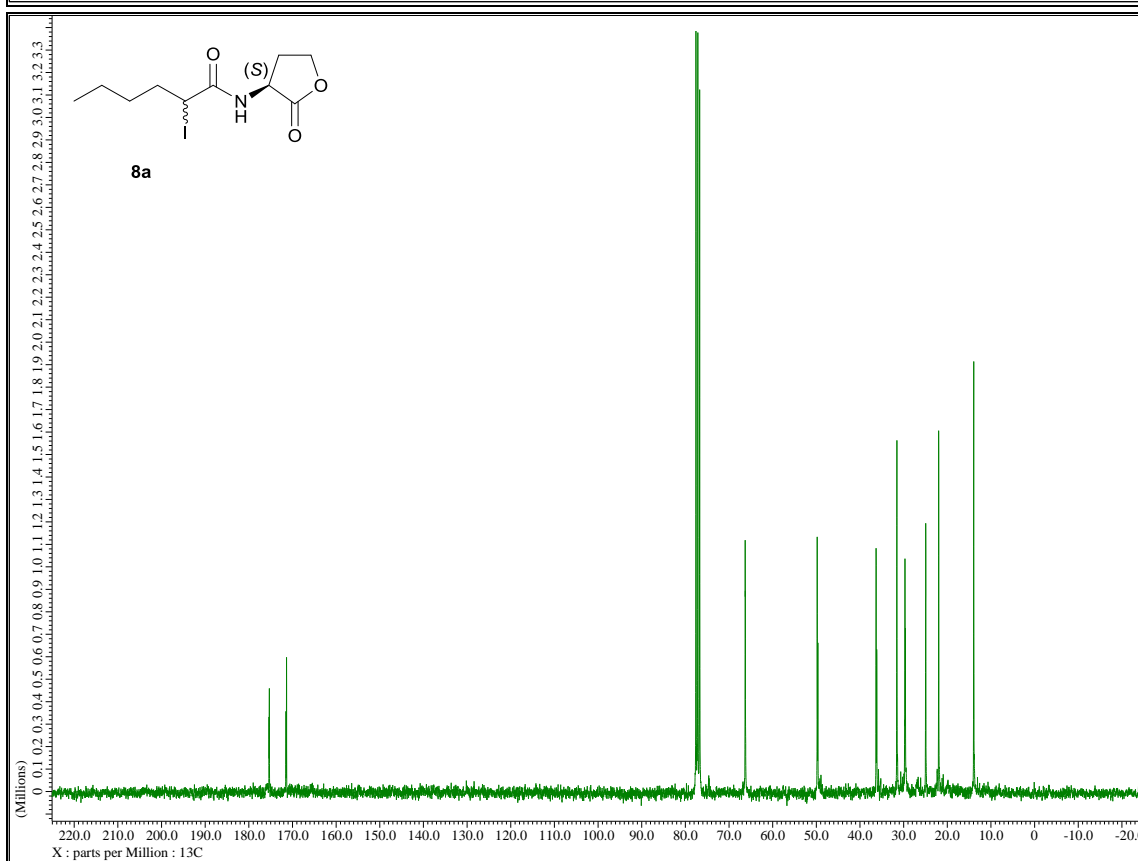

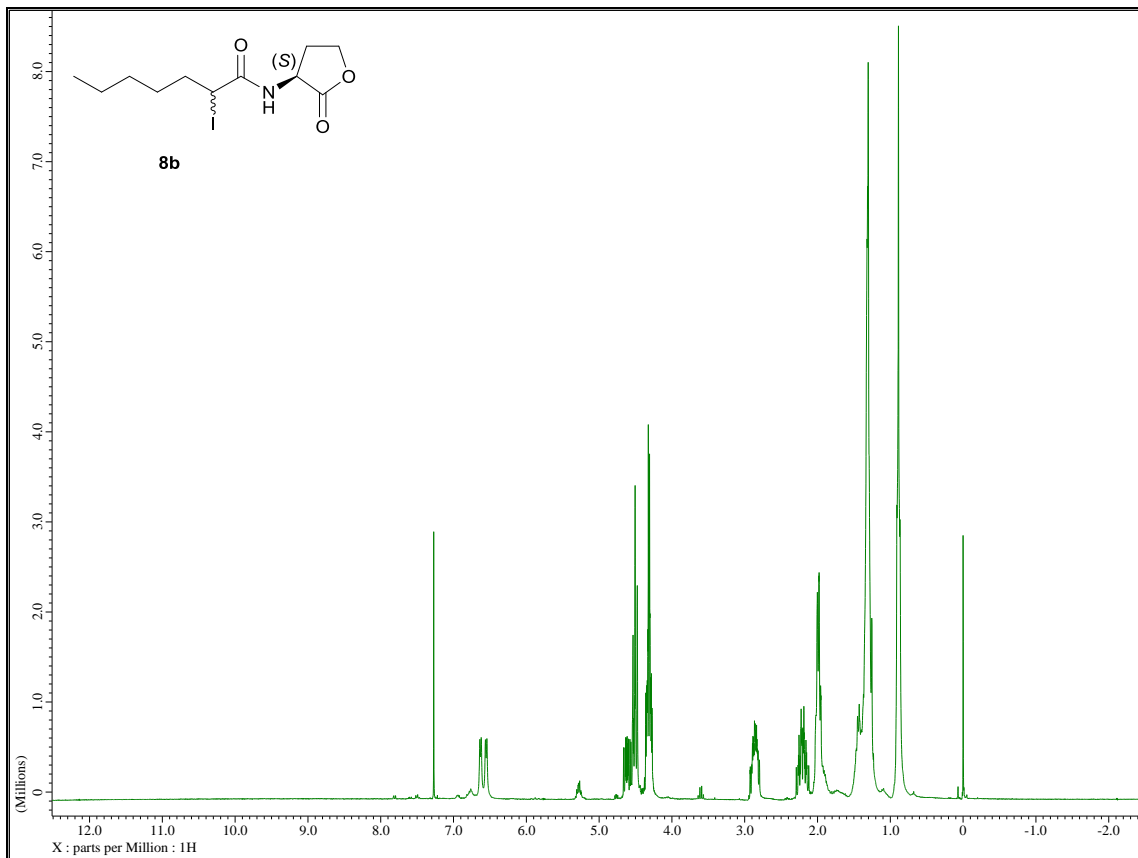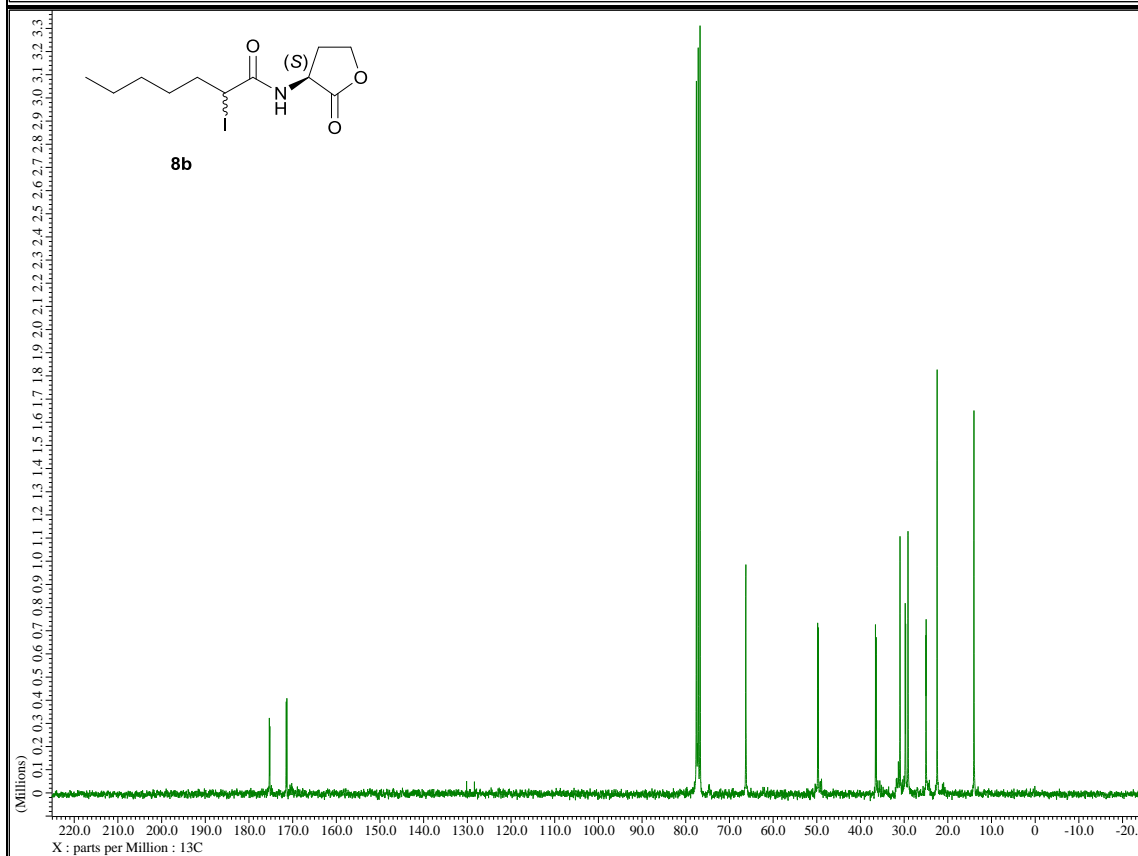

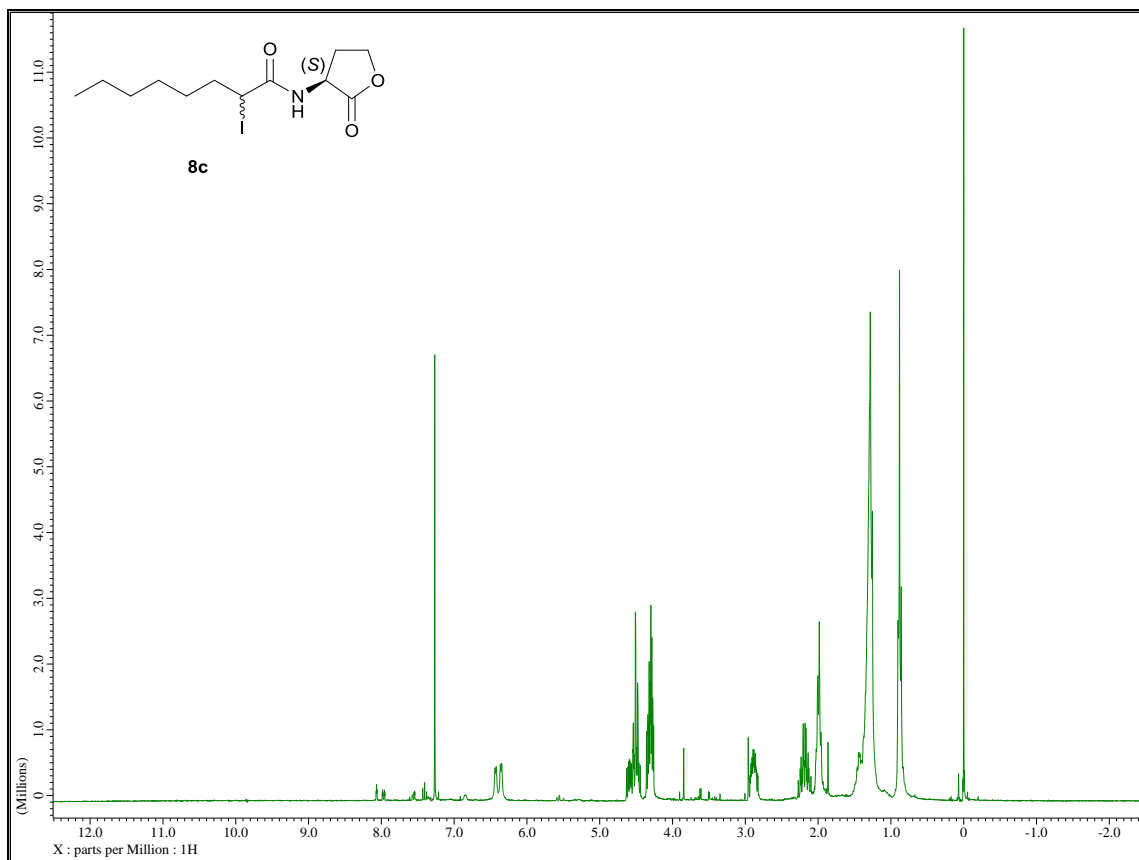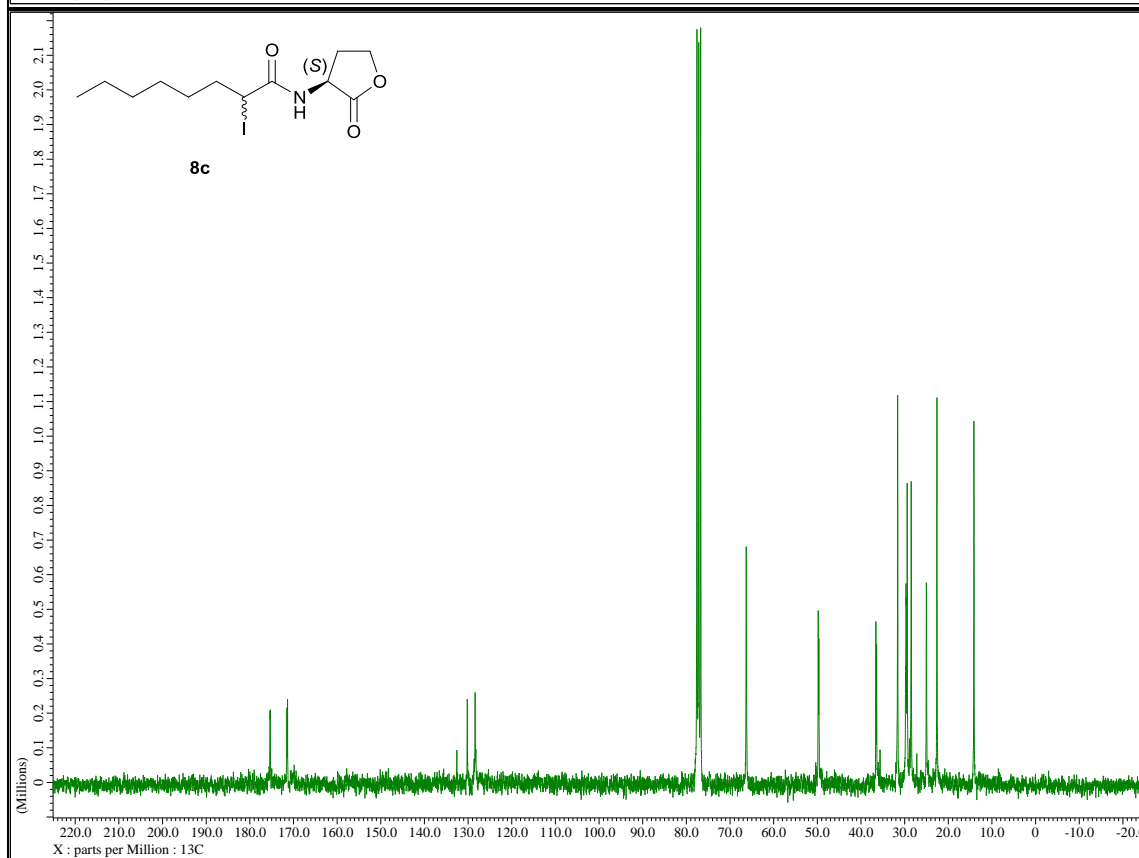

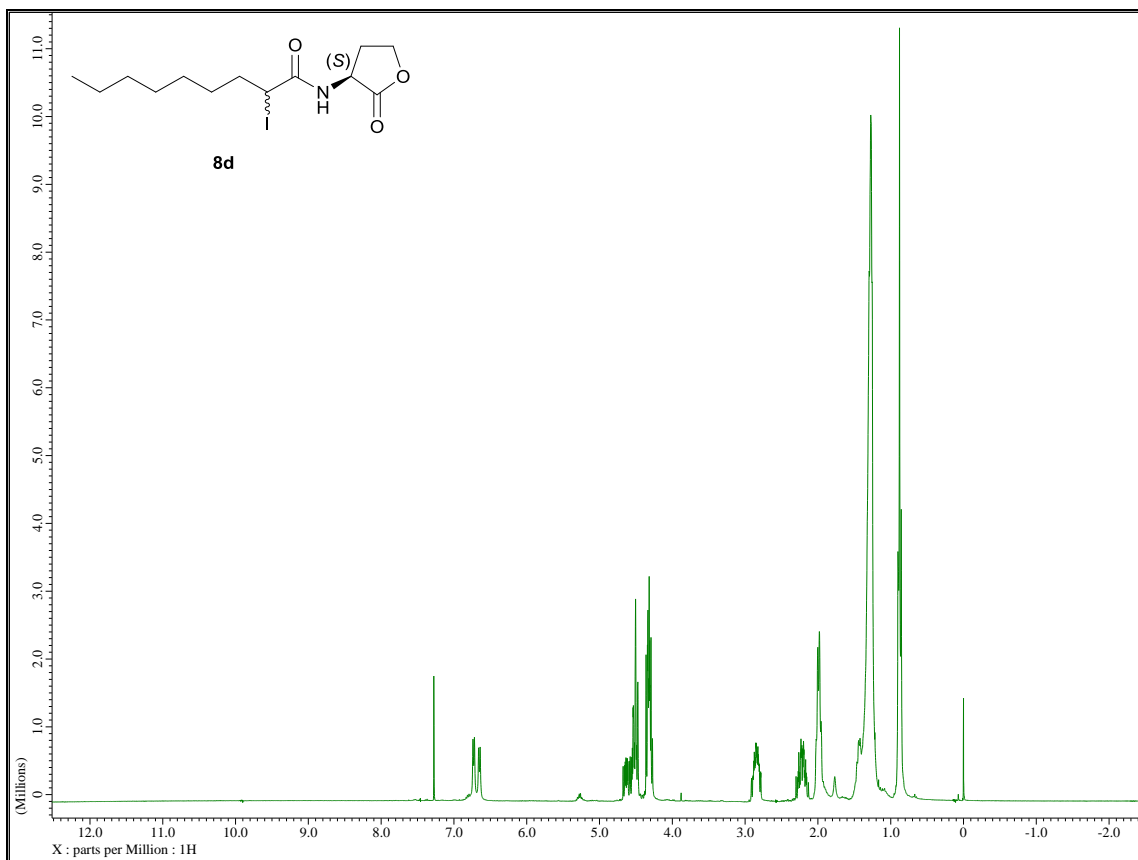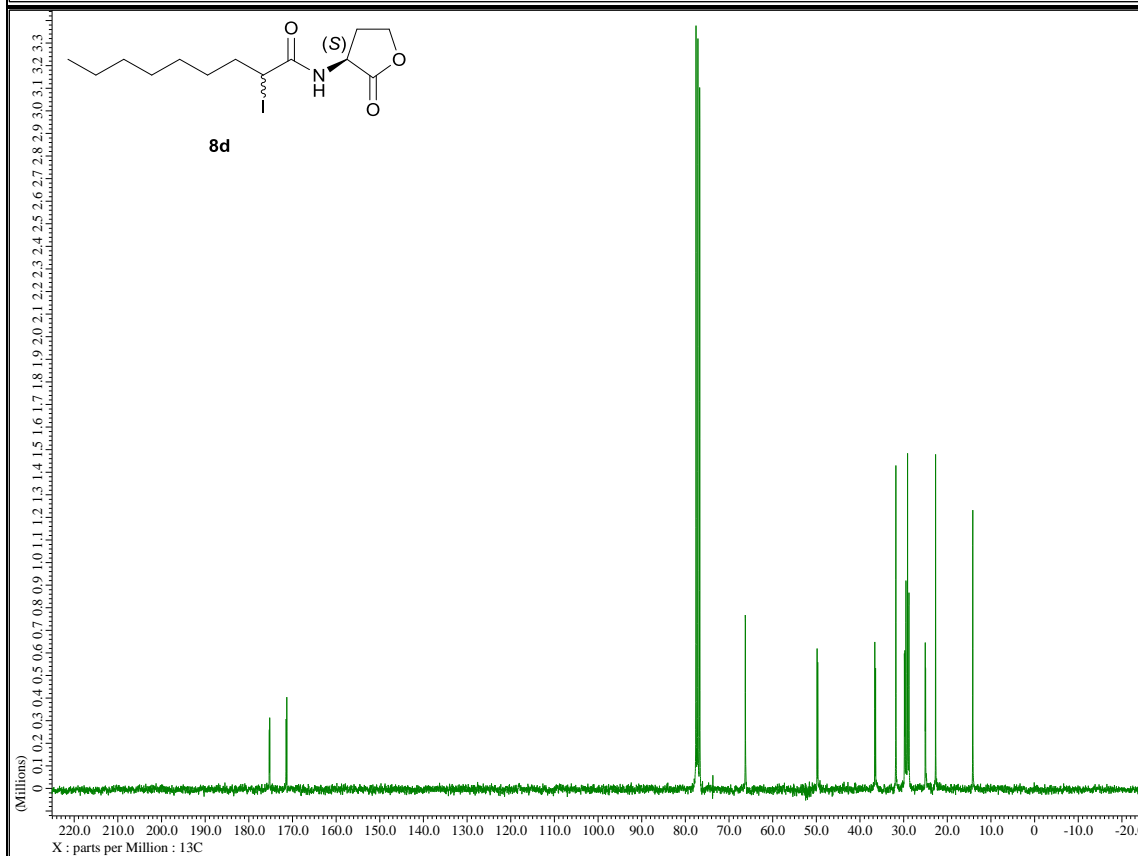

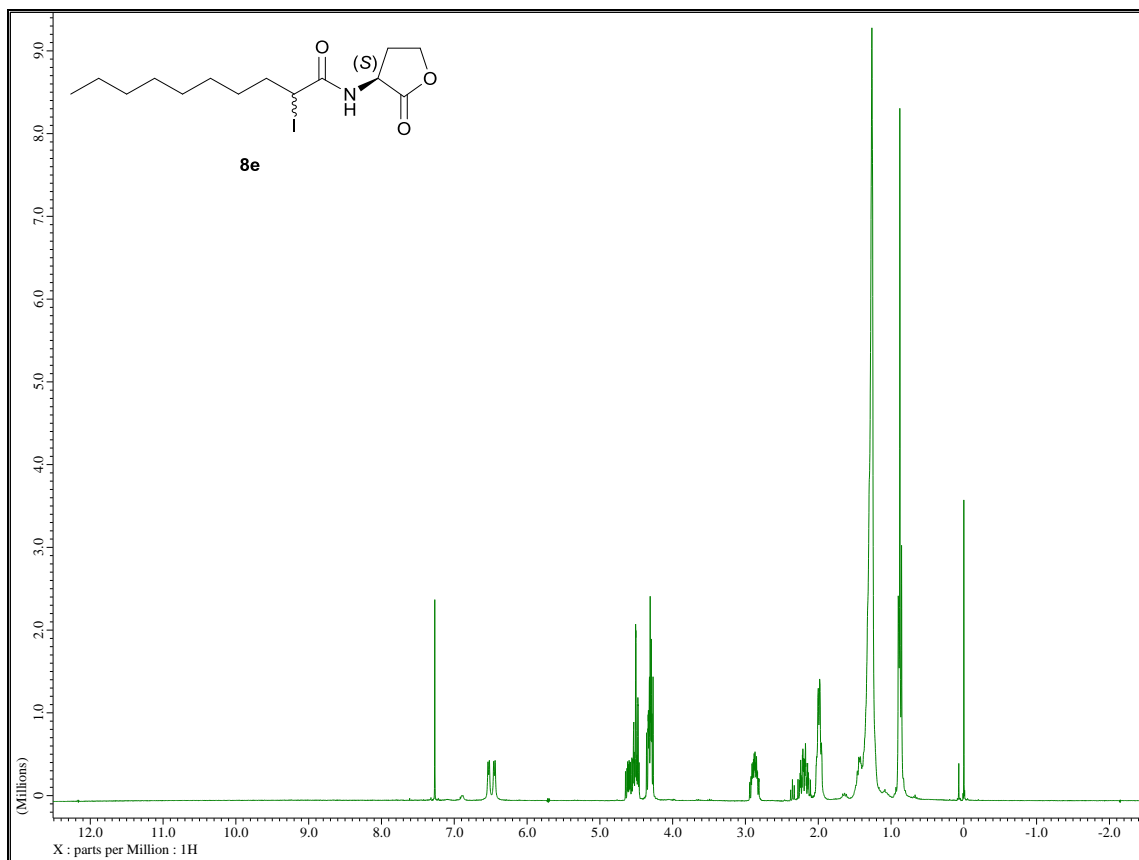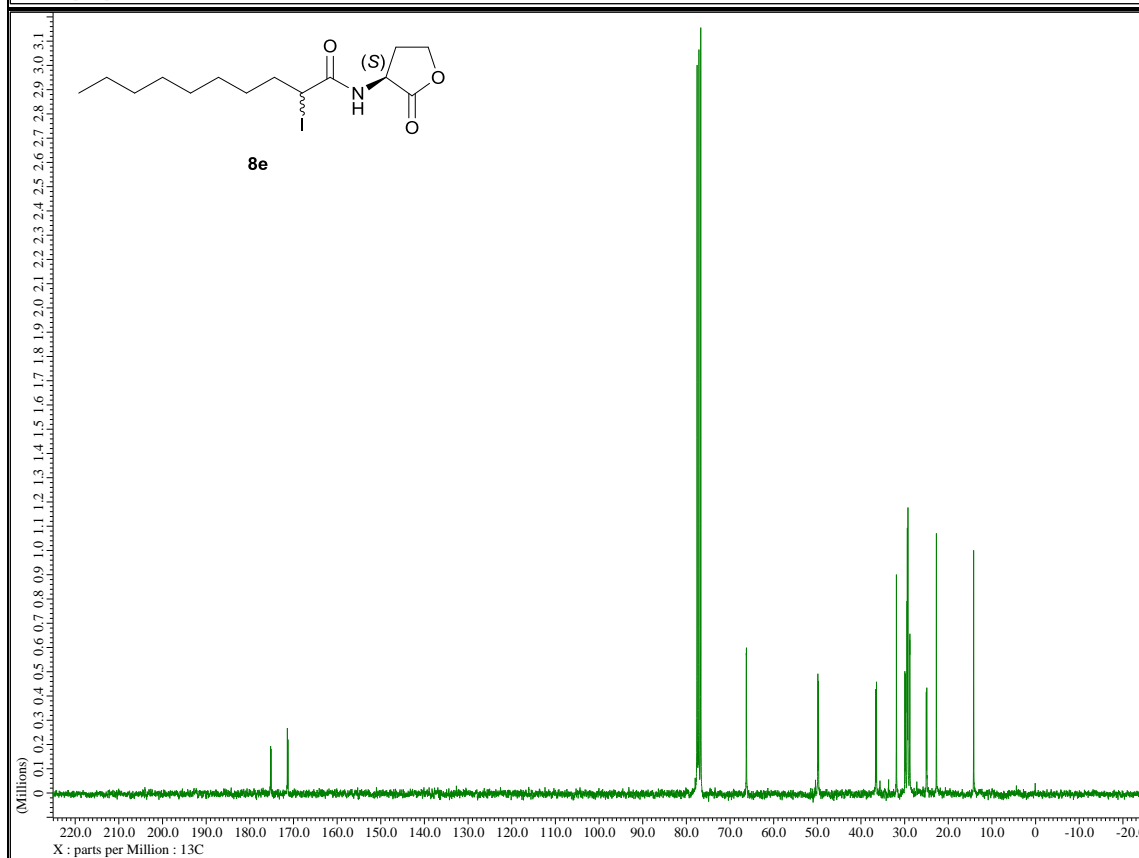



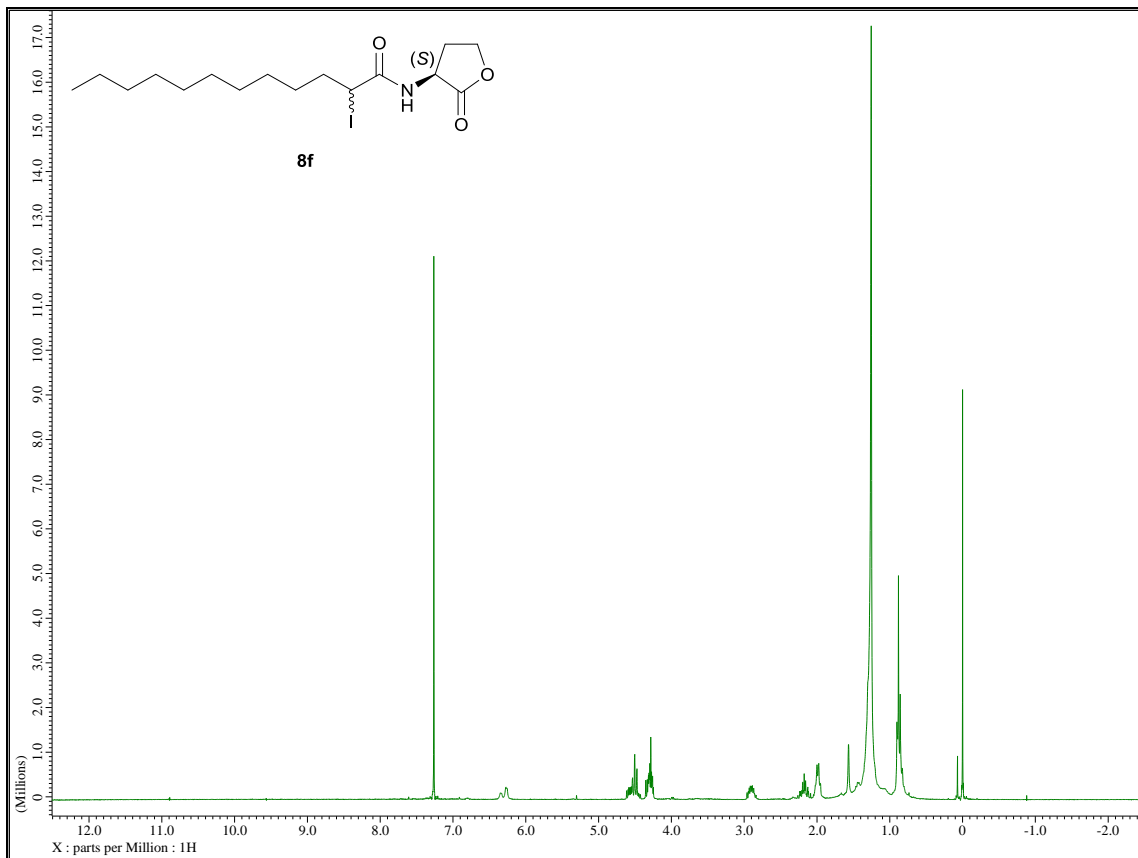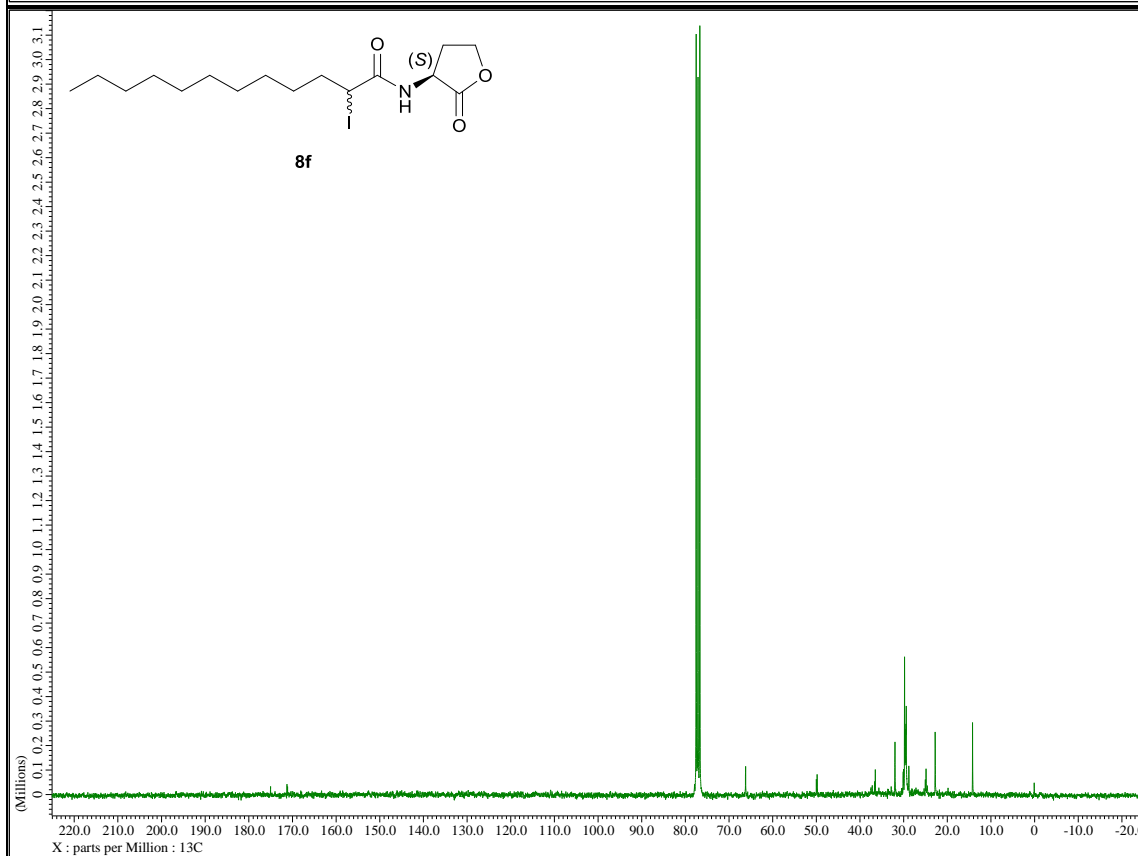

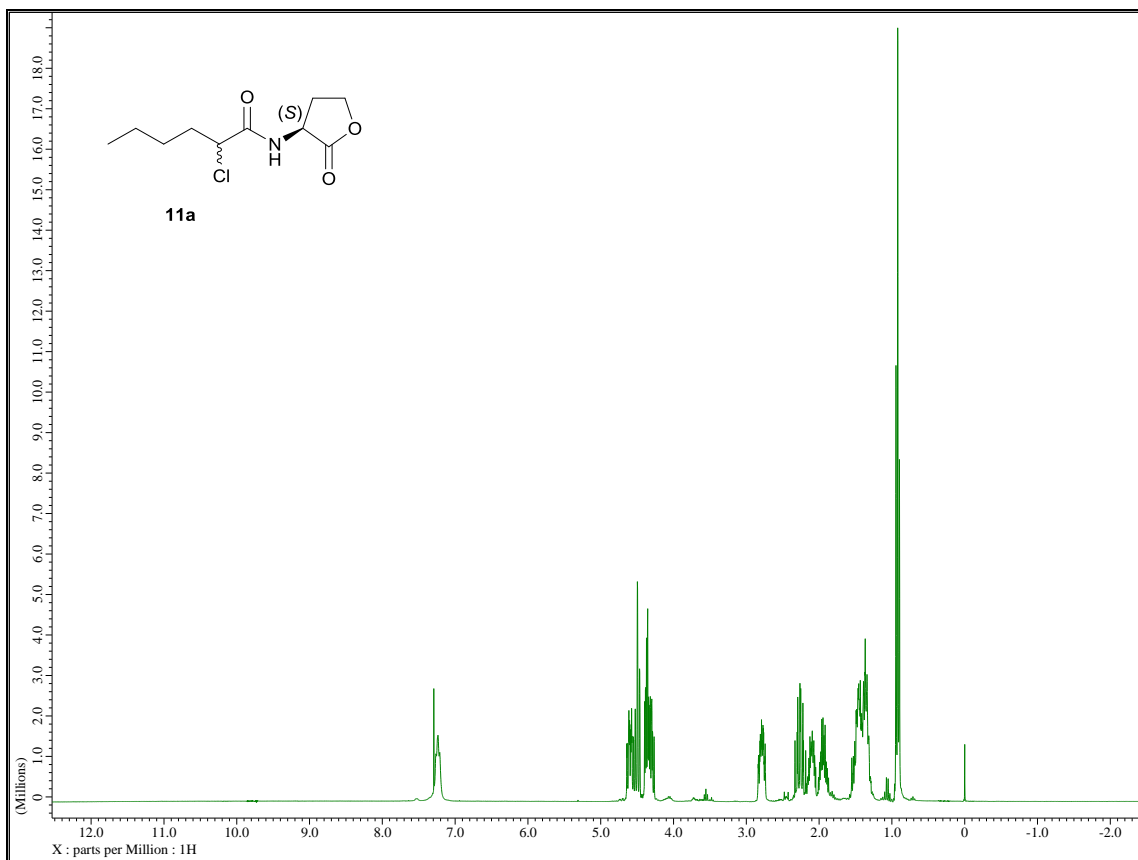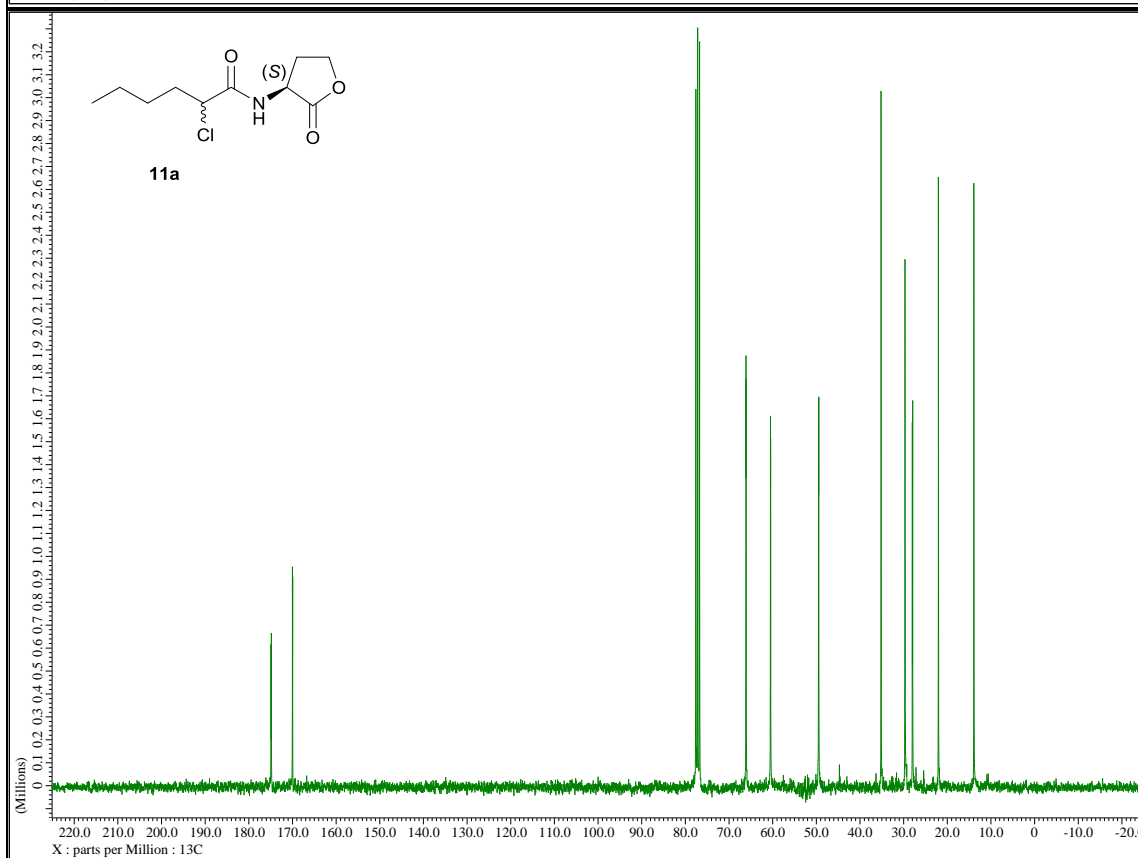

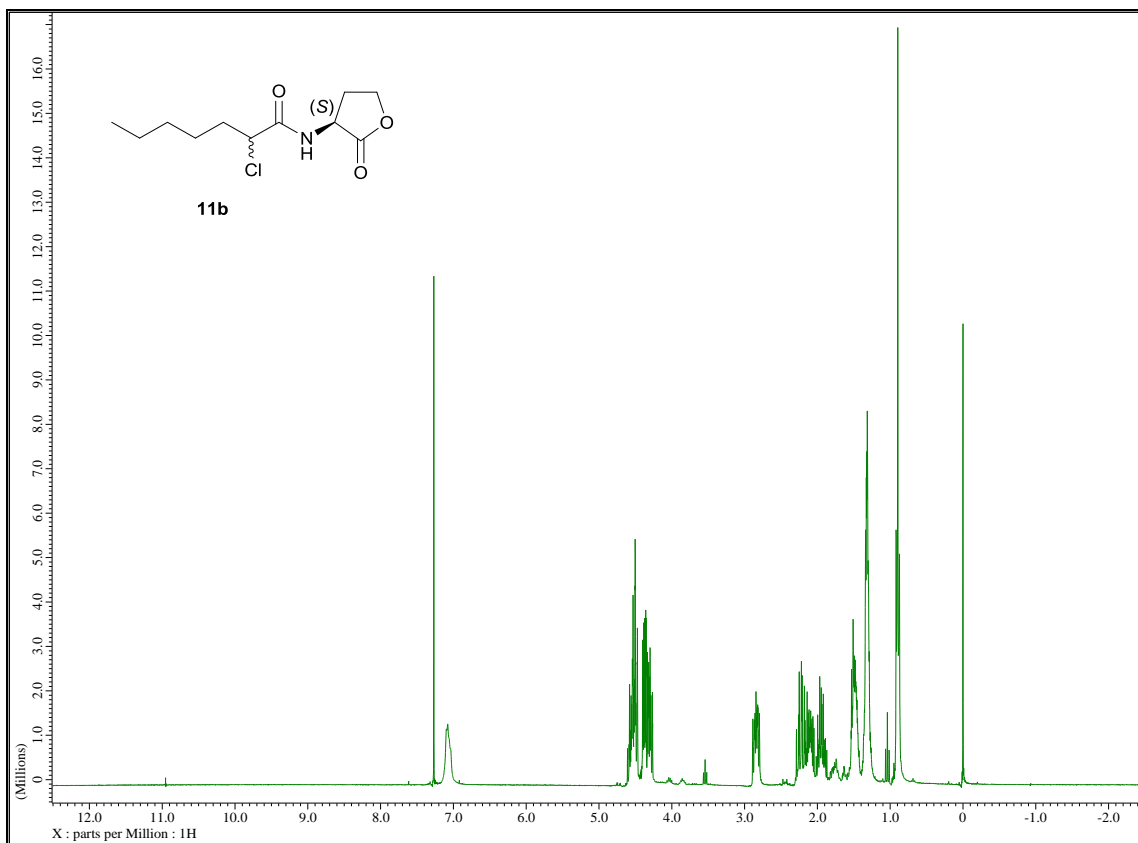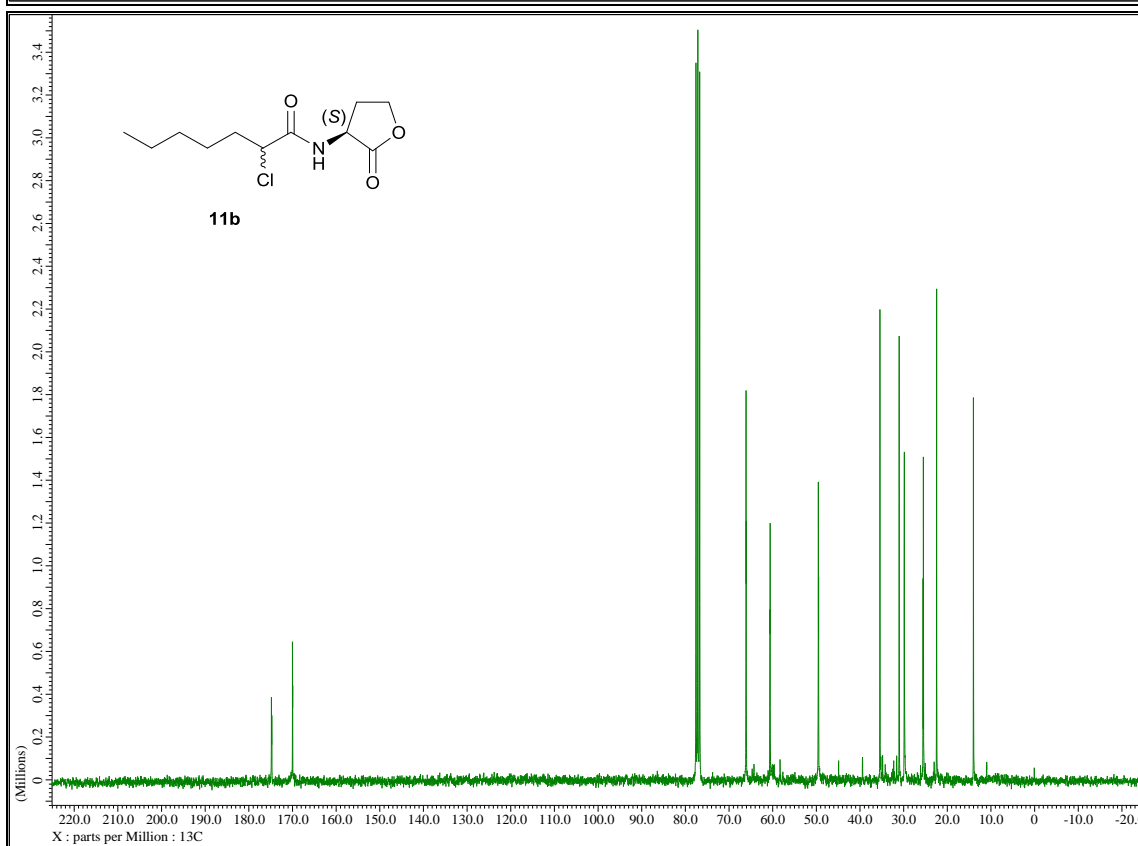

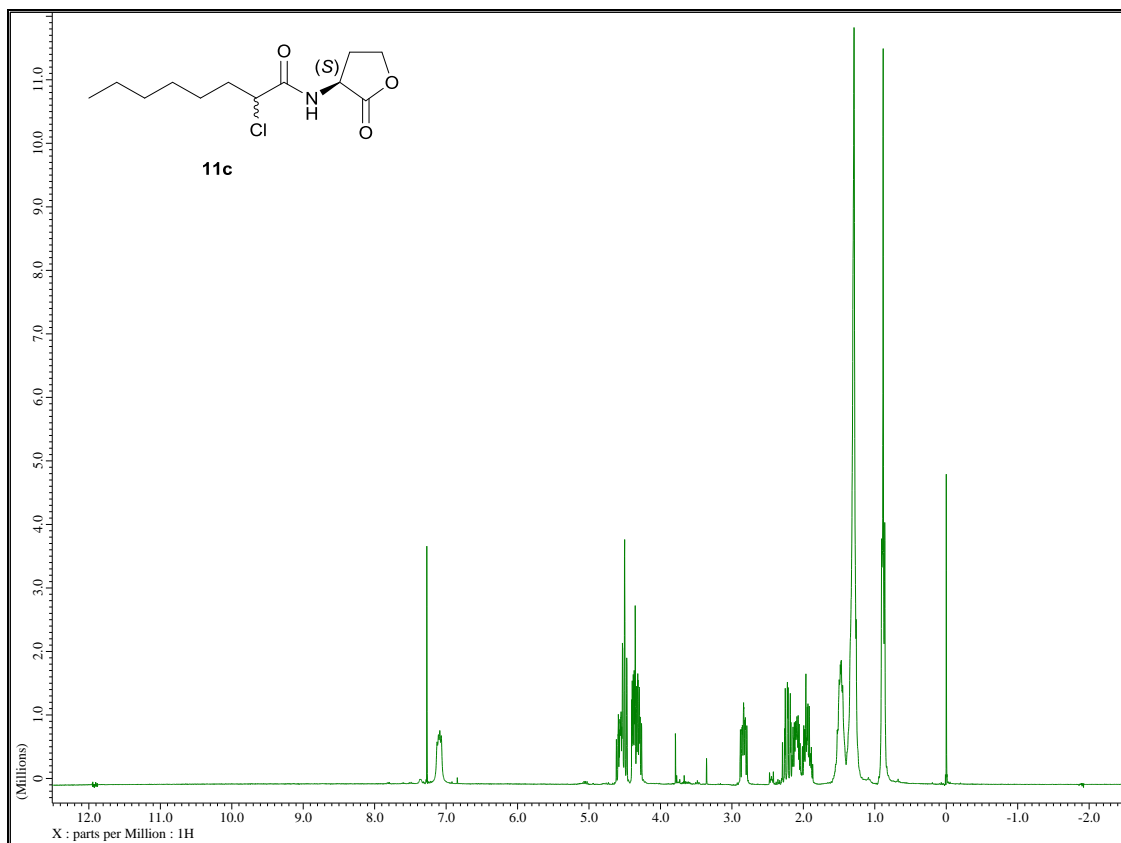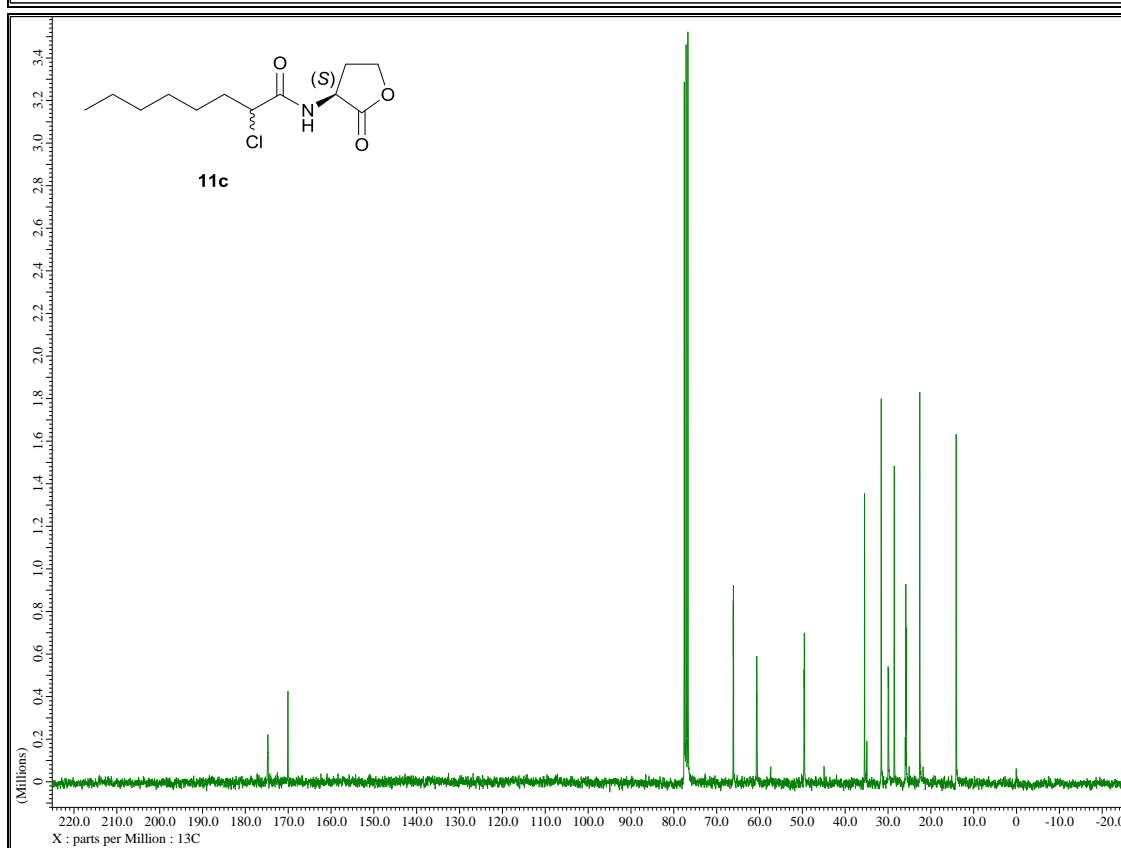

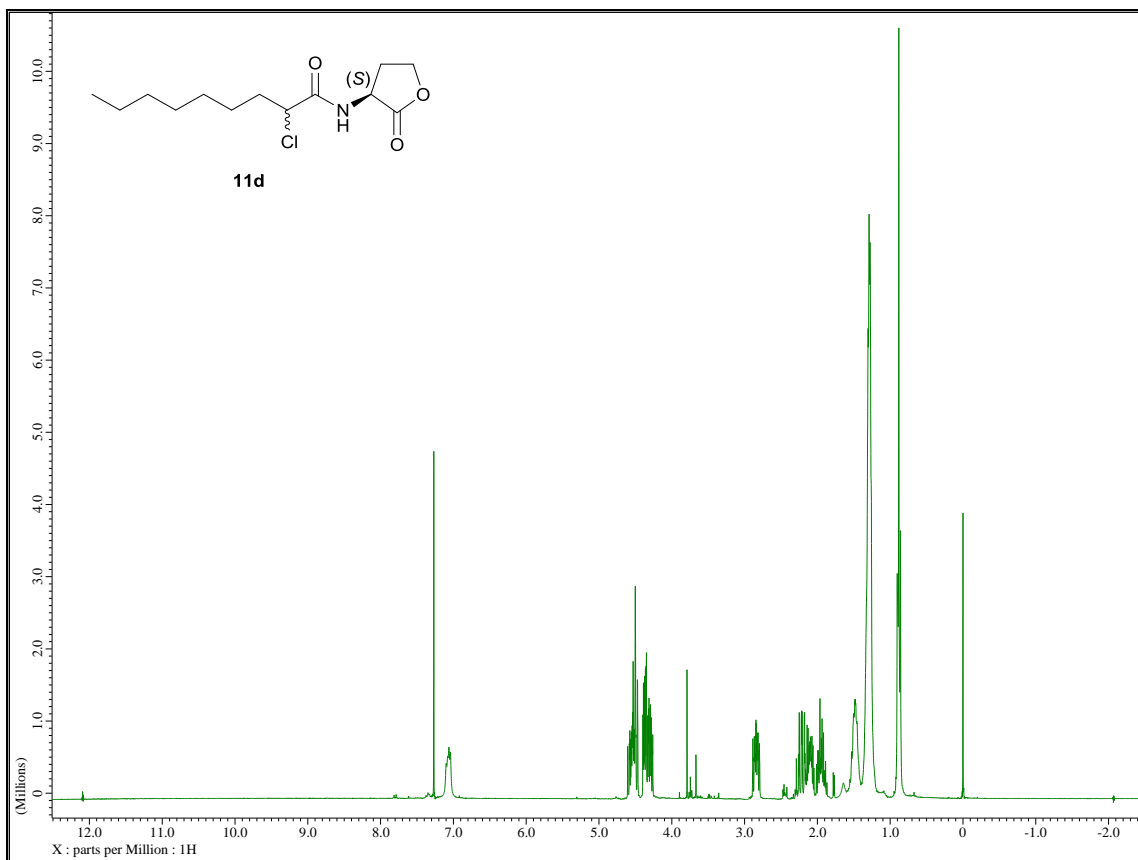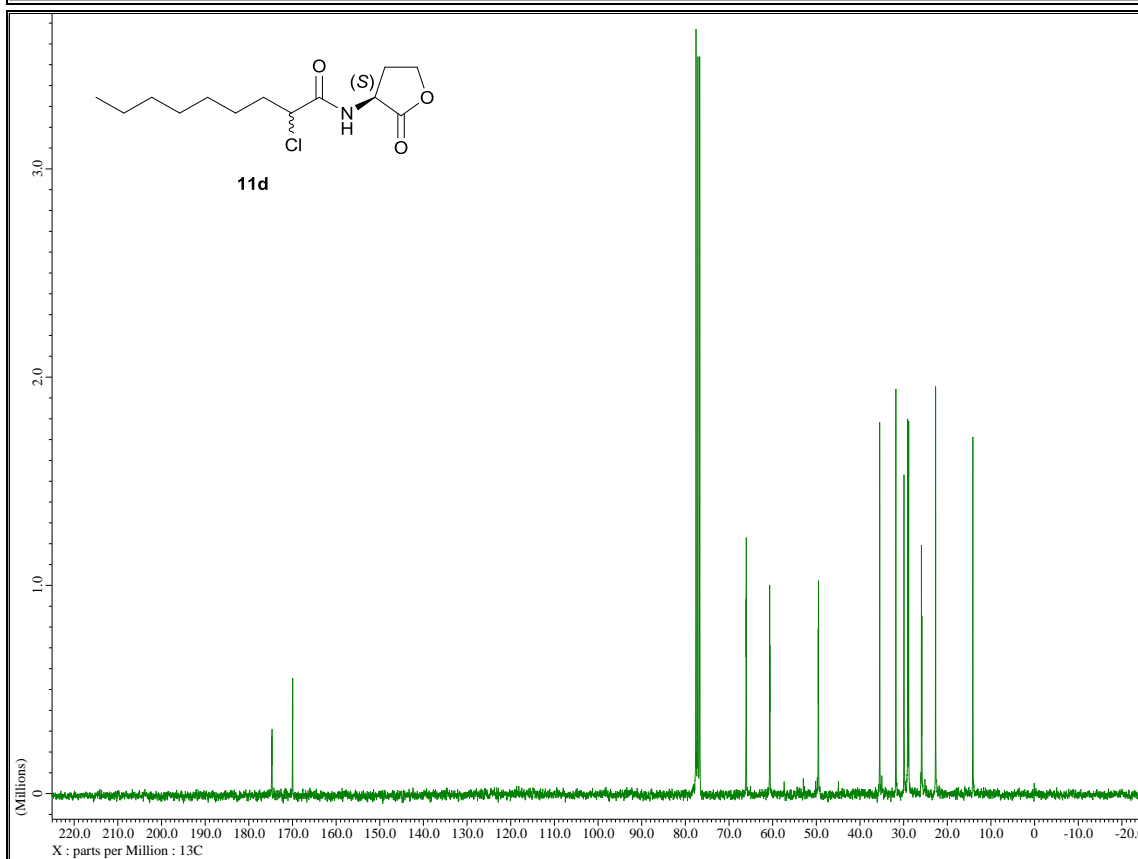

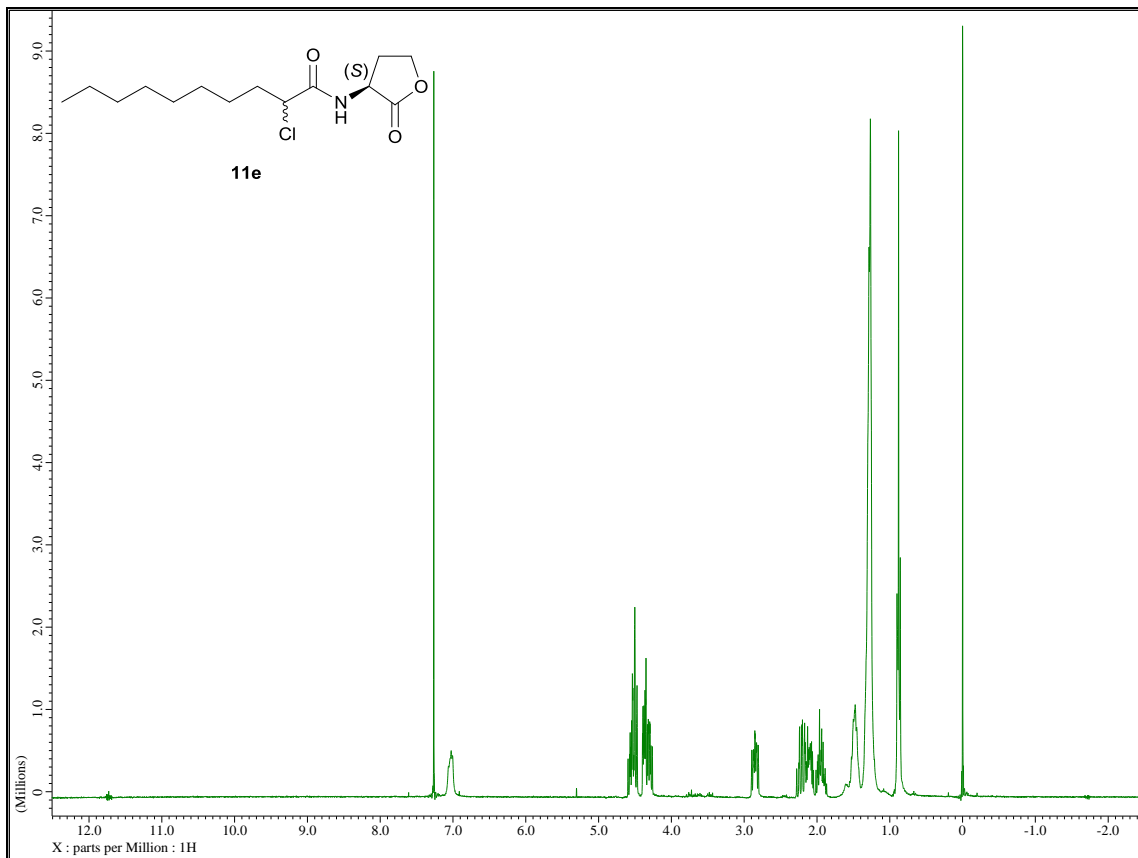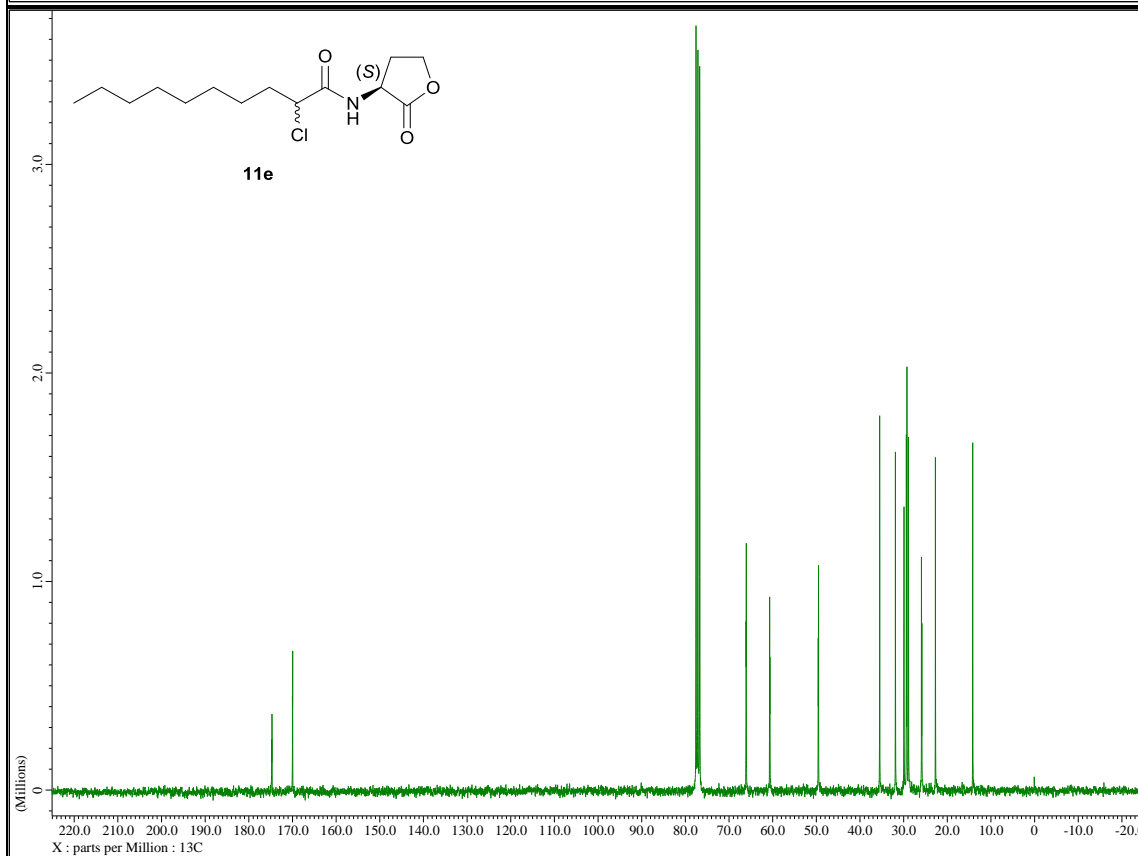

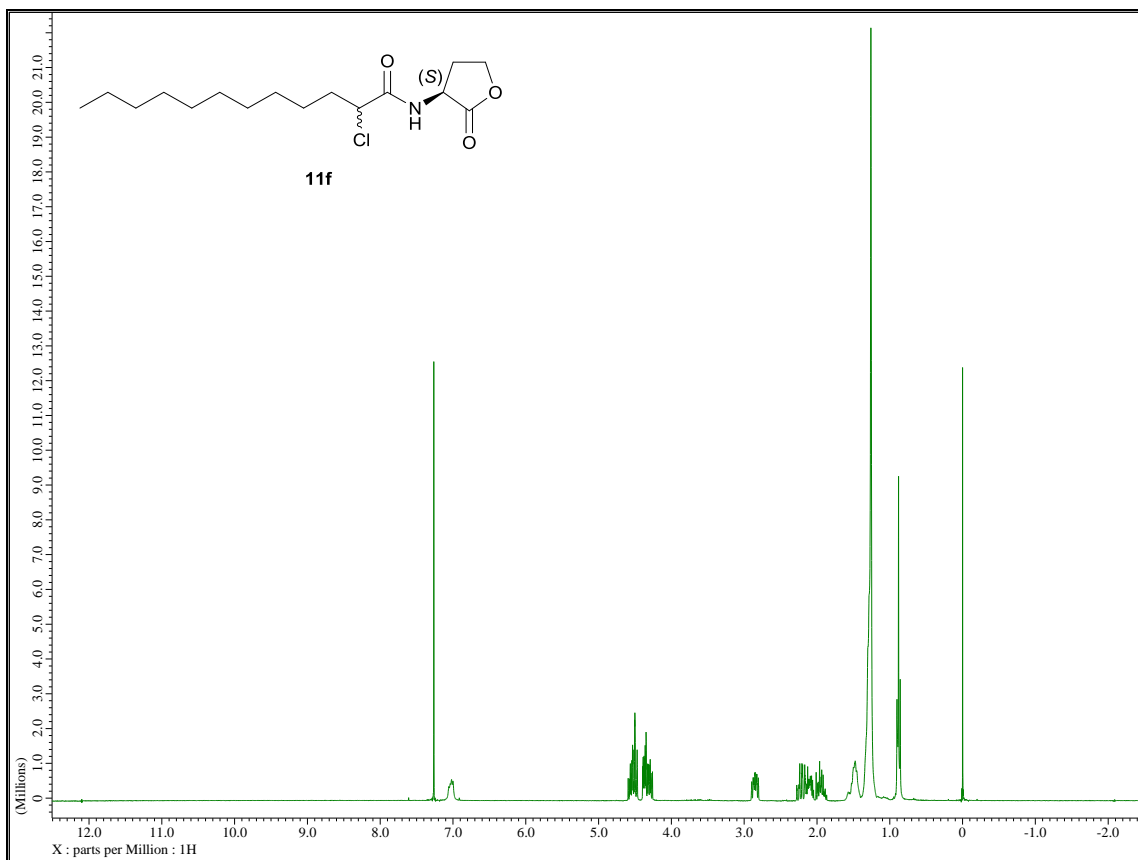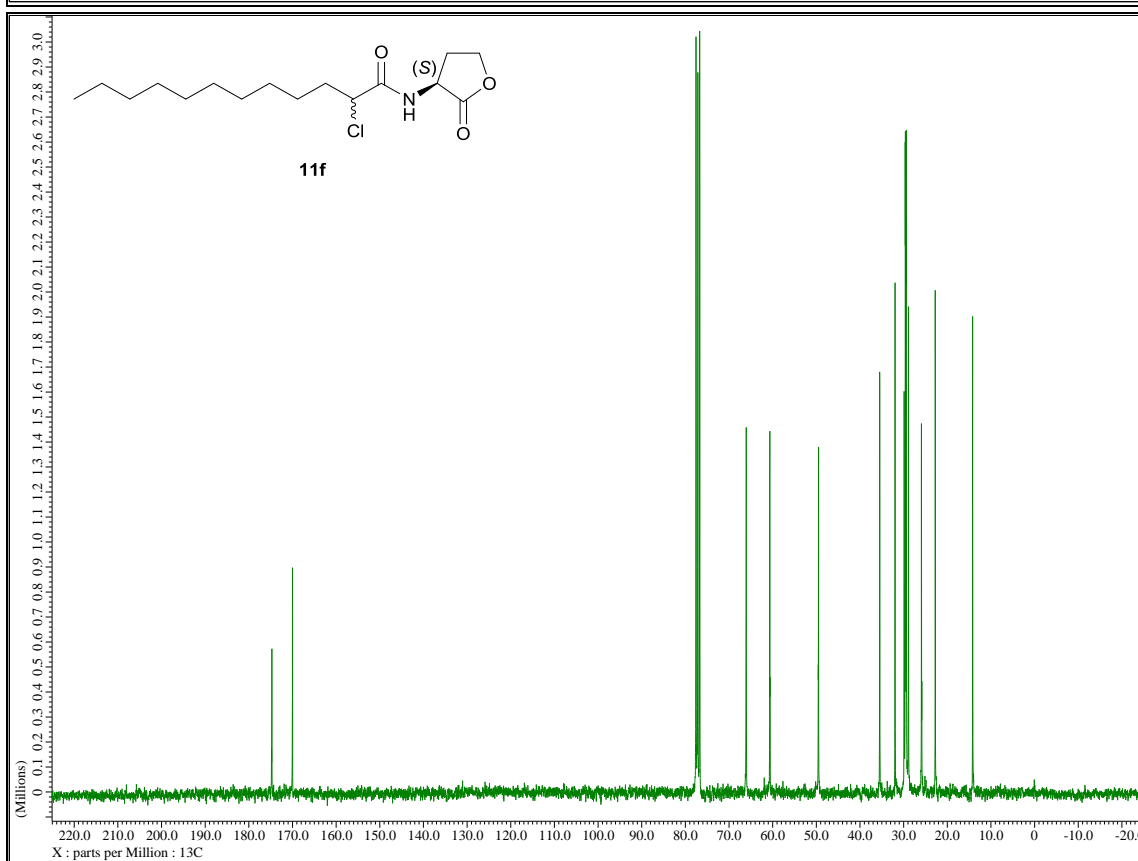

Supplement: Additional file 2 [file 1860-5397-10-265-S2.pdf]
