# Supplementary material for: Synthesis and biological evaluation of novel N-α-haloacylated homoserine lactones as quorum sensing modulators
Source: publisher site journal article supplement (doi:10.3762/bjoc.10.265), 2014-10-30
Supplement: Additional file 1 [file 1860-5397-10-265-S1.pdf]

## Supporting Information File 1

for

# Synthesis and biological evaluation of novel *N*- $\alpha$ -haloacylated homoserine lactones as quorum sensing modulators

Michail Syrpas, Ewout Ruysbergh, Christian V. Stevens, Norbert De Kimpe and Sven Mangelinckx \*

Address: <sup>1</sup>Department of Sustainable Organic Chemistry and Technology, Ghent University, Coupure Links 653, B-9000 Ghent, Belgium

Email: Sven Mangelinckx - Sven.Mangelinckx@Ugent.be

\* Corresponding author

### Graphical representation of QS activity of natural and $\alpha$ -haloacylated analogues

Comparison of natural AHLs **3c–f** with  $\alpha$ -haloacylated analogues **6**, **8** and **11**.

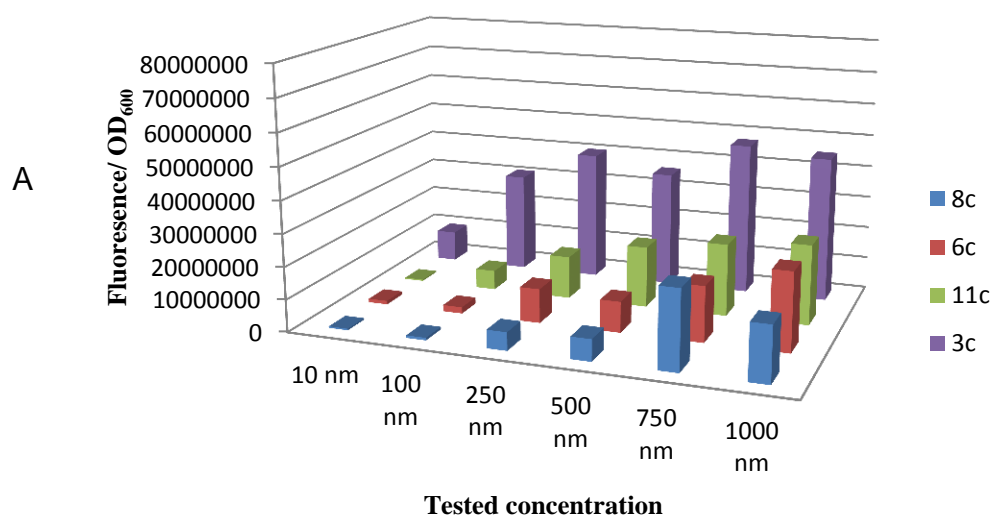

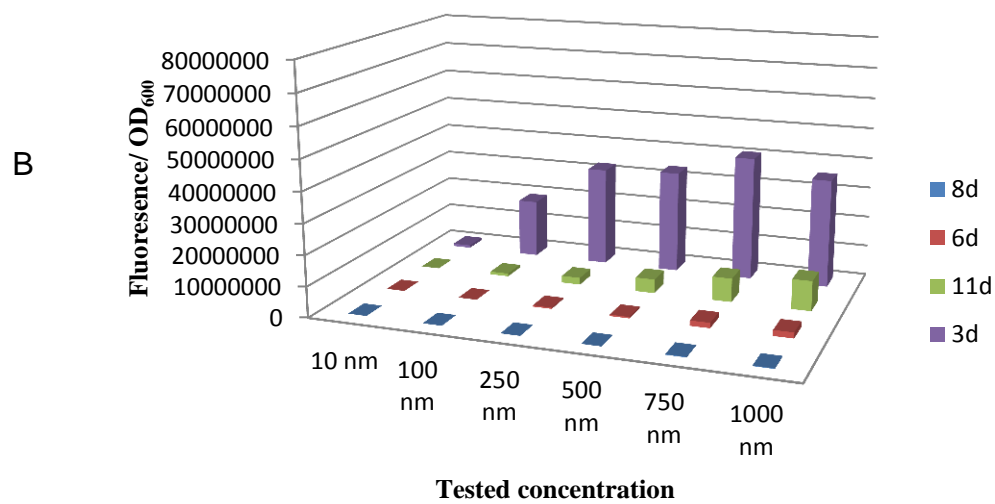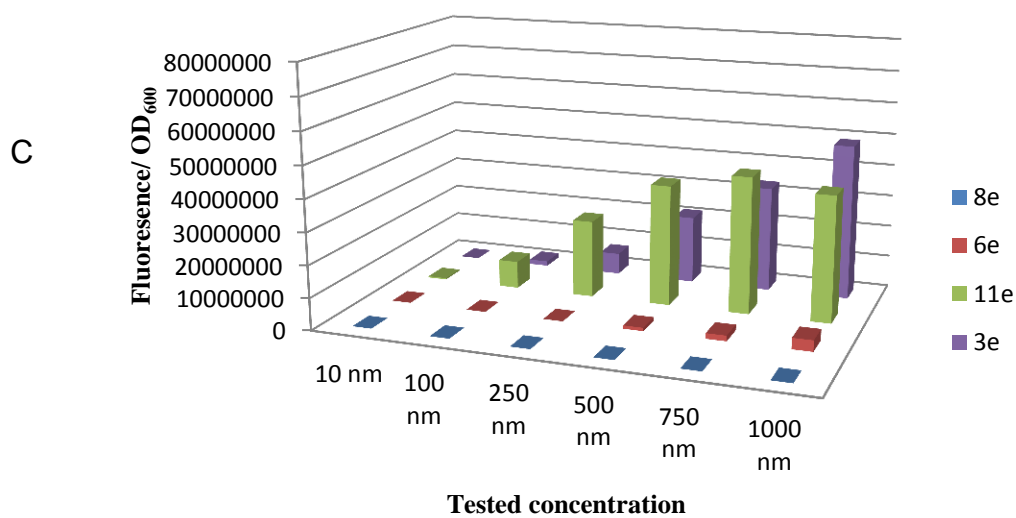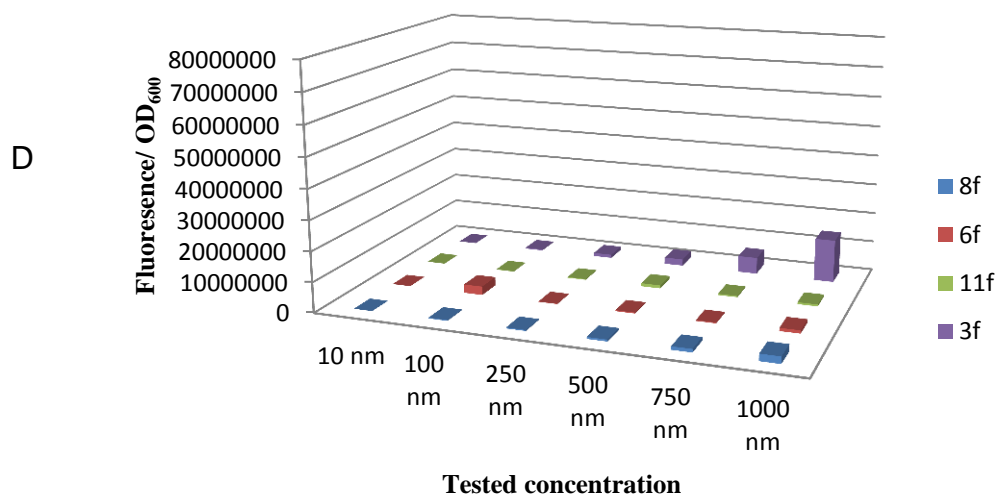

**Figure S1:** Normalized fluorescence values for natural AHLs **3c–d** and  $\alpha$ -haloacylated analogues **6**, **8** and **11** tested in various concentrations. **A**; comparison of AHLs with chain length of **8** carbons. **B**; comparison of AHLs with chain length of **9** carbons. **C**; comparison of AHLs with chain length of **10** carbons **D**; comparison of AHLs with chain length of **12** carbons.
